# Supplementary material for: Highly Selective Synthesis of Interlocked Carbazole-based Cages and their Application in Effective Solar-driven Water Evaporation
Source: Research Square preprint supplement (doi:10.21203/rs.3.rs-5527004/v1), 2024-12-09

## checkCIF/PLATON report

Structure factors have been supplied for datablock(s) cu\_20240708a\_1\_a

THIS REPORT IS FOR GUIDANCE ONLY. IF USED AS PART OF A REVIEW PROCEDURE FOR PUBLICATION, IT SHOULD NOT REPLACE THE EXPERTISE OF AN EXPERIENCED CRYSTALLOGRAPHIC REFEREE.

No syntax errors found.      CIF dictionary      Interpreting this report

### Datablock: cu\_20240708a\_1\_a

---

|                        |                                                        |                                                                         |
|------------------------|--------------------------------------------------------|-------------------------------------------------------------------------|
| Bond precision:        | C-C = 0.0186 Å                                         | Wavelength=1.54178                                                      |
| Cell:                  | a=30.283 (1)      b=32.1268 (12)      c=36.5647 (14)   |                                                                         |
|                        | alpha=90      beta=94.511 (2)      gamma=90            |                                                                         |
| Temperature:           | 150 K                                                  |                                                                         |
|                        | Calculated                                             | Reported                                                                |
| Volume                 | 35464 (2)                                              | 35463 (2)                                                               |
| Space group            | P 21/n                                                 | P 1 21/n 1                                                              |
| Hall group             | -P 2yn                                                 | -P 2yn                                                                  |
| Moiety formula         | 2 (C144 H140 N8 O12 Rh6),<br>7 (C F3 O3 S) [+ solvent] | 2 (C144 H140 N8 O12 Rh6),<br>7 (C F3 O3 S), 11.5 [CF3SO3],<br>1 [CH3OH] |
| Sum formula            | C295 H280 F21 N16 O45 Rh12<br>S7 [+ solvent]           | C307.50 H284 F55.50 N16<br>O80.50 Rh12 S18.50                           |
| Mr                     | 6627.71                                                | 8374.02                                                                 |
| Dx, g cm <sup>-3</sup> | 1.241                                                  | 1.568                                                                   |
| Z                      | 4                                                      | 4                                                                       |
| Mu (mm <sup>-1</sup> ) | 5.369                                                  | 6.342                                                                   |
| F000                   | 13452.0                                                | 16882.0                                                                 |
| F000'                  | 13504.08                                               |                                                                         |
| h, k, lmax             | 33, 35, 40                                             | 33, 35, 40                                                              |
| Nref                   | 51466                                                  | 51070                                                                   |
| Tmin, Tmax             | 0.444, 0.386                                           |                                                                         |
| Tmin'                  | 0.336                                                  |                                                                         |

Correction method= Not given

Data completeness= 0.992

Theta (max)= 59.256

R(reflections)= 0.1055( 21206)

wR2(reflections)=  
0.2598( 51070)

S = 1.094

Npar= 3409

---

The following ALERTS were generated. Each ALERT has the format

**test-name\_ALERT\_alert-type\_alert-level.**

Click on the hyperlinks for more details of the test.

---

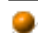

### Alert level B

RINTA01\_ALERT\_3\_B The value of Rint is greater than 0.18

Rint given 0.186

THETM01\_ALERT\_3\_B The value of sine(theta\_max)/wavelength is less than 0.575

Calculated sin(theta\_max)/wavelength = 0.5574

PLAT020\_ALERT\_3\_B The Value of Rint is Greater Than 0.12 ..... 0.186 Report

PLAT260\_ALERT\_2\_B Large Average Ueq of Residue Including S3 0.384 Check

PLAT260\_ALERT\_2\_B Large Average Ueq of Residue Including S5 0.327 Check

---

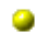

### Alert level C

PLAT026\_ALERT\_3\_C Ratio Observed / Unique Reflections (too) Low .. 42% Check  
PLAT052\_ALERT\_1\_C Info on Absorption Correction Method Not Given Please Do !  
PLAT082\_ALERT\_2\_C High R1 Value ..... 0.11 Report  
PLAT084\_ALERT\_3\_C High wR2 Value (i.e. > 0.25) ..... 0.26 Report  
PLAT220\_ALERT\_2\_C NonSolvent Resd 1 C Ueq(max)/Ueq(min) Range 4.3 Ratio  
PLAT220\_ALERT\_2\_C NonSolvent Resd 2 C Ueq(max)/Ueq(min) Range 4.1 Ratio  
PLAT222\_ALERT\_3\_C NonSolvent Resd 1 H Uiso(max)/Uiso(min) Range 5.3 Ratio  
PLAT222\_ALERT\_3\_C NonSolvent Resd 2 H Uiso(max)/Uiso(min) Range 5.1 Ratio  
PLAT242\_ALERT\_2\_C Low 'MainMol' Ueq as Compared to Neighbors of Rh1 Check  
PLAT242\_ALERT\_2\_C Low 'MainMol' Ueq as Compared to Neighbors of Rh3 Check  
PLAT242\_ALERT\_2\_C Low 'MainMol' Ueq as Compared to Neighbors of Rh8 Check  
PLAT242\_ALERT\_2\_C Low 'MainMol' Ueq as Compared to Neighbors of Rh12 Check  
PLAT242\_ALERT\_2\_C Low 'MainMol' Ueq as Compared to Neighbors of N7 Check  
PLAT242\_ALERT\_2\_C Low 'MainMol' Ueq as Compared to Neighbors of N15 Check  
PLAT242\_ALERT\_2\_C Low 'MainMol' Ueq as Compared to Neighbors of Rh2 Check  
PLAT242\_ALERT\_2\_C Low 'MainMol' Ueq as Compared to Neighbors of Rh7 Check  
PLAT242\_ALERT\_2\_C Low 'MainMol' Ueq as Compared to Neighbors of Rh9 Check  
PLAT244\_ALERT\_4\_C Low 'Solvent' Ueq as Compared to Neighbors of S1 Check  
PLAT244\_ALERT\_4\_C Low 'Solvent' Ueq as Compared to Neighbors of S2 Check  
PLAT244\_ALERT\_4\_C Low 'Solvent' Ueq as Compared to Neighbors of S3 Check  
PLAT244\_ALERT\_4\_C Low 'Solvent' Ueq as Compared to Neighbors of S4 Check  
PLAT244\_ALERT\_4\_C Low 'Solvent' Ueq as Compared to Neighbors of S5 Check  
PLAT244\_ALERT\_4\_C Low 'Solvent' Ueq as Compared to Neighbors of S6 Check  
PLAT244\_ALERT\_4\_C Low 'Solvent' Ueq as Compared to Neighbors of S7 Check  
PLAT250\_ALERT\_2\_C Large U3/U1 Ratio for <U(i,j)> Tensor(Resd 8) 2.7 Note  
PLAT260\_ALERT\_2\_C Large Average Ueq of Residue Including Rh1 0.144 Check  
PLAT260\_ALERT\_2\_C Large Average Ueq of Residue Including Rh2 0.126 Check  
PLAT260\_ALERT\_2\_C Large Average Ueq of Residue Including S1 0.220 Check  
PLAT260\_ALERT\_2\_C Large Average Ueq of Residue Including S2 0.251 Check  
PLAT260\_ALERT\_2\_C Large Average Ueq of Residue Including S4 0.239 Check  
PLAT260\_ALERT\_2\_C Large Average Ueq of Residue Including S6 0.213 Check  
PLAT260\_ALERT\_2\_C Large Average Ueq of Residue Including S7 0.240 Check  
PLAT342\_ALERT\_3\_C Low Bond Precision on C-C Bonds ..... 0.01859 Ang.  
PLAT369\_ALERT\_2\_C Long C(sp2)-C(sp2) Bond C232 - C258 . 1.53 Ang.  
PLAT410\_ALERT\_2\_C Short Intra H...H Contact H216 ..H230 . 1.99 Ang.

PLAT434\_ALERT\_2\_C Short Inter HL..HL Contact F15  $x,y,z = \dots$  1\_555 Check  
 $\dots$  F20  $\dots$  2.50 Ang.  
 $3/2-x, -1/2+y, 3/2-z = \dots$  2\_646 Check  
 PLAT905\_ALERT\_3\_C Negative K value in the Analysis of Variance ... -14.687 Report  
 PLAT905\_ALERT\_3\_C Negative K value in the Analysis of Variance ... -0.216 Report  
 PLAT911\_ALERT\_3\_C Missing FCF Refl Between Thmin & STh/L= 0.557 395 Report  
 2 0 0, 1 1 0, 1 2 0, 2 2 0, 3 2 0, 5 2 0,  
 6 3 0, 33 7 0, 1 10 0, 32 11 0, 15 32 0, 13 33 0,  
 7 35 0, -31 0 1, 1 0 1, -5 1 1, -3 1 1, 1 1 1,  
 3 1 1, -2 2 1, -1 2 1, 0 2 1, 5 2 1, 9 3 1,  
 2 5 1, 4 5 1, 33 6 1, -33 7 1, 11 9 1, -31 14 1,  
 30 16 1, 29 18 1, 15 32 1, -13 33 1, -7 35 1, 7 35 1,  
 0 0 2, 2 0 2, -2 1 2, -1 1 2, 0 1 2, 1 2 2,  
 -3 3 2, -1 3 2, 0 3 2, 4 4 2, 6 4 2, 33 5 2,  
 33 6 2, -31 14 2, -28 20 2, -7 35 2, -1 0 3, 1 0 3,  
 33 0 3, -2 1 3, -3 2 3, 0 2 3, 2 2 3, 13 2 3,  
 -1 3 3, 4 3 3, 33 5 3, 32 10 3, 31 13 3, -31 14 3,  
 -28 20 3, 18 30 3, -13 33 3, 10 34 3, 0 0 4, -4 3 4,  
 33 3 4, 3 4 4, 33 4 4, 32 9 4, -31 14 4, 28 19 4,  
 -15 32 4, 6 35 4, 33 0 5, -7 1 5, 33 1 5, 1 2 5,  
 33 2 5, -33 7 5, -31 14 5, 29 17 5, 16 31 5, 12 33 5,  
 -10 34 5, -6 35 5, -5 1 6, -1 1 6, 8 3 6, -33 7 6,  
 PLAT977\_ALERT\_2\_C Check Negative Difference Density on H28H  $\dots$  -0.34 eA-3

### Alert level G

FORMU01\_ALERT\_1\_G There is a discrepancy between the atom counts in the  
 \_chemical\_formula\_sum and \_chemical\_formula\_moiety. This is  
 usually due to the moiety formula being in the wrong format.  
 Atom count from \_chemical\_formula\_sum: C307.5 H284 F55.5 N16 O80.5 R  
 Atom count from \_chemical\_formula\_moiety: C306.5 H280 F55.5 N16 O79.5 R  
 FORMU01\_ALERT\_2\_G There is a discrepancy between the atom counts in the  
 \_chemical\_formula\_sum and the formula from the \_atom\_site\* data.  
 Atom count from \_chemical\_formula\_sum: C307.5 H284 F55.5 N16 O80.5 Rh12  
 Atom count from the \_atom\_site data: C295 H280 F21 N16 O45 Rh12 S7  
 CELLZ01\_ALERT\_1\_G Difference between formula and atom\_site contents detected.  
 CELLZ01\_ALERT\_1\_G ALERT: Large difference may be due to a  
 symmetry error - see SYMMG tests  
 From the CIF: \_cell\_formula\_units\_Z 4  
 From the CIF: \_chemical\_formula\_sum C307.50 H284 F55.50 N16 O80.50 Rh1  
 TEST: Compare cell contents of formula and atom\_site data  
  

| atom | Z*formula | cif sites | diff   |
|------|-----------|-----------|--------|
| C    | 1230.00   | 1180.00   | 50.00  |
| H    | 1136.00   | 1120.00   | 16.00  |
| F    | 222.00    | 84.00     | 138.00 |
| N    | 64.00     | 64.00     | 0.00   |
| O    | 322.00    | 180.00    | 142.00 |
| Rh   | 48.00     | 48.00     | 0.00   |
| S    | 74.00     | 28.00     | 46.00  |

  
 PLAT002\_ALERT\_2\_G Number of Distance or Angle Restraints on AtSite 161 Note  
 PLAT003\_ALERT\_2\_G Number of Uiso or U(i,j) Restrained non-H Atoms 396 Report  
 PLAT041\_ALERT\_1\_G Calc. and Reported SumFormula Strings Differ Please Check  
 Calc: C295 H280 F21 N16 O45 Rh12 S7  
 Rep.: C307.50 H284 F55.50 N16 O80.50 Rh12 S18.50  
 PLAT042\_ALERT\_1\_G Calc. and Reported MoietyFormula Strings Differ Please Check  
 Calc: 2(C144 H140 N8 O12 Rh6), 7(C F3 O3 S)



|                   |                                                  |        |        |
|-------------------|--------------------------------------------------|--------|--------|
| PLAT191_ALERT_3_G | A Non-default SADI Restraint Value has been used | 0.0400 | Report |
| PLAT191_ALERT_3_G | A Non-default SADI Restraint Value has been used | 0.0400 | Report |
| PLAT191_ALERT_3_G | A Non-default SADI Restraint Value has been used | 0.0400 | Report |
| PLAT244_ALERT_4_G | Low 'Solvent' Ueq as Compared to Neighbors of    | C9     | Check  |
| PLAT244_ALERT_4_G | Low 'Solvent' Ueq as Compared to Neighbors of    | C73    | Check  |
| PLAT244_ALERT_4_G | Low 'Solvent' Ueq as Compared to Neighbors of    | C147   | Check  |
| PLAT244_ALERT_4_G | Low 'Solvent' Ueq as Compared to Neighbors of    | C289   | Check  |
| PLAT244_ALERT_4_G | Low 'Solvent' Ueq as Compared to Neighbors of    | C293   | Check  |
| PLAT244_ALERT_4_G | Low 'Solvent' Ueq as Compared to Neighbors of    | C145   | Check  |
| PLAT244_ALERT_4_G | Low 'Solvent' Ueq as Compared to Neighbors of    | C291   | Check  |
| PLAT344_ALERT_2_G | Unusual sp3 Angle Range in Solvent/Ion for       | C73    | Check  |
| PLAT380_ALERT_4_G | Incorrectly? Oriented X(sp2)-Methyl Moiety ..... | C2     | Check  |
| PLAT380_ALERT_4_G | Incorrectly? Oriented X(sp2)-Methyl Moiety ..... | C245   | Check  |
| PLAT380_ALERT_4_G | Incorrectly? Oriented X(sp2)-Methyl Moiety ..... | C273   | Check  |
| PLAT380_ALERT_4_G | Incorrectly? Oriented X(sp2)-Methyl Moiety ..... | C233   | Check  |
| PLAT380_ALERT_4_G | Incorrectly? Oriented X(sp2)-Methyl Moiety ..... | C257   | Check  |
| PLAT380_ALERT_4_G | Incorrectly? Oriented X(sp2)-Methyl Moiety ..... | C33    | Check  |
| PLAT380_ALERT_4_G | Incorrectly? Oriented X(sp2)-Methyl Moiety ..... | C285   | Check  |
| PLAT380_ALERT_4_G | Incorrectly? Oriented X(sp2)-Methyl Moiety ..... | C237   | Check  |
| PLAT380_ALERT_4_G | Incorrectly? Oriented X(sp2)-Methyl Moiety ..... | C59    | Check  |
| PLAT380_ALERT_4_G | Incorrectly? Oriented X(sp2)-Methyl Moiety ..... | C61    | Check  |
| PLAT380_ALERT_4_G | Incorrectly? Oriented X(sp2)-Methyl Moiety ..... | C253   | Check  |
| PLAT380_ALERT_4_G | Incorrectly? Oriented X(sp2)-Methyl Moiety ..... | C265   | Check  |
| PLAT380_ALERT_4_G | Incorrectly? Oriented X(sp2)-Methyl Moiety ..... | C277   | Check  |
| PLAT380_ALERT_4_G | Incorrectly? Oriented X(sp2)-Methyl Moiety ..... | C69    | Check  |
| PLAT380_ALERT_4_G | Incorrectly? Oriented X(sp2)-Methyl Moiety ..... | C71    | Check  |
| PLAT380_ALERT_4_G | Incorrectly? Oriented X(sp2)-Methyl Moiety ..... | C235   | Check  |
| PLAT380_ALERT_4_G | Incorrectly? Oriented X(sp2)-Methyl Moiety ..... | C117   | Check  |
| PLAT380_ALERT_4_G | Incorrectly? Oriented X(sp2)-Methyl Moiety ..... | C247   | Check  |
| PLAT380_ALERT_4_G | Incorrectly? Oriented X(sp2)-Methyl Moiety ..... | C243   | Check  |
| PLAT380_ALERT_4_G | Incorrectly? Oriented X(sp2)-Methyl Moiety ..... | C123   | Check  |
| PLAT380_ALERT_4_G | Incorrectly? Oriented X(sp2)-Methyl Moiety ..... | C255   | Check  |
| PLAT380_ALERT_4_G | Incorrectly? Oriented X(sp2)-Methyl Moiety ..... | C127   | Check  |
| PLAT380_ALERT_4_G | Incorrectly? Oriented X(sp2)-Methyl Moiety ..... | C267   | Check  |
| PLAT380_ALERT_4_G | Incorrectly? Oriented X(sp2)-Methyl Moiety ..... | C263   | Check  |
| PLAT380_ALERT_4_G | Incorrectly? Oriented X(sp2)-Methyl Moiety ..... | C133   | Check  |
| PLAT380_ALERT_4_G | Incorrectly? Oriented X(sp2)-Methyl Moiety ..... | C275   | Check  |
| PLAT380_ALERT_4_G | Incorrectly? Oriented X(sp2)-Methyl Moiety ..... | C137   | Check  |
| PLAT380_ALERT_4_G | Incorrectly? Oriented X(sp2)-Methyl Moiety ..... | C283   | Check  |
| PLAT380_ALERT_4_G | Incorrectly? Oriented X(sp2)-Methyl Moiety ..... | C143   | Check  |
| PLAT380_ALERT_4_G | Incorrectly? Oriented X(sp2)-Methyl Moiety ..... | C193   | Check  |
| PLAT380_ALERT_4_G | Incorrectly? Oriented X(sp2)-Methyl Moiety ..... | C5     | Check  |
| PLAT380_ALERT_4_G | Incorrectly? Oriented X(sp2)-Methyl Moiety ..... | C7     | Check  |
| PLAT380_ALERT_4_G | Incorrectly? Oriented X(sp2)-Methyl Moiety ..... | C11    | Check  |
| PLAT380_ALERT_4_G | Incorrectly? Oriented X(sp2)-Methyl Moiety ..... | C217   | Check  |
| PLAT380_ALERT_4_G | Incorrectly? Oriented X(sp2)-Methyl Moiety ..... | C21    | Check  |
| PLAT380_ALERT_4_G | Incorrectly? Oriented X(sp2)-Methyl Moiety ..... | C205   | Check  |
| PLAT380_ALERT_4_G | Incorrectly? Oriented X(sp2)-Methyl Moiety ..... | C27    | Check  |
| PLAT380_ALERT_4_G | Incorrectly? Oriented X(sp2)-Methyl Moiety ..... | C43    | Check  |
| PLAT380_ALERT_4_G | Incorrectly? Oriented X(sp2)-Methyl Moiety ..... | C197   | Check  |
| PLAT380_ALERT_4_G | Incorrectly? Oriented X(sp2)-Methyl Moiety ..... | C49    | Check  |
| PLAT380_ALERT_4_G | Incorrectly? Oriented X(sp2)-Methyl Moiety ..... | C51    | Check  |
| PLAT380_ALERT_4_G | Incorrectly? Oriented X(sp2)-Methyl Moiety ..... | C213   | Check  |
| PLAT380_ALERT_4_G | Incorrectly? Oriented X(sp2)-Methyl Moiety ..... | C225   | Check  |
| PLAT380_ALERT_4_G | Incorrectly? Oriented X(sp2)-Methyl Moiety ..... | C87    | Check  |
| PLAT380_ALERT_4_G | Incorrectly? Oriented X(sp2)-Methyl Moiety ..... | C85    | Check  |
| PLAT380_ALERT_4_G | Incorrectly? Oriented X(sp2)-Methyl Moiety ..... | C195   | Check  |



It is advisable to attempt to resolve as many as possible of the alerts in all categories. Often the minor alerts point to easily fixed oversights, errors and omissions in your CIF or refinement strategy, so attention to these fine details can be worthwhile. In order to resolve some of the more serious problems it may be necessary to carry out additional measurements or structure refinements. However, the purpose of your study may justify the reported deviations and the more serious of these should normally be commented upon in the discussion or experimental section of a paper or in the "special\_details" fields of the CIF. checkCIF was carefully designed to identify outliers and unusual parameters, but every test has its limitations and alerts that are not important in a particular case may appear. Conversely, the absence of alerts does not guarantee there are no aspects of the results needing attention. It is up to the individual to critically assess their own results and, if necessary, seek expert advice.

### **Publication of your CIF in IUCr journals**

A basic structural check has been run on your CIF. These basic checks will be run on all CIFs submitted for publication in IUCr journals (*Acta Crystallographica*, *Journal of Applied Crystallography*, *Journal of Synchrotron Radiation*); however, if you intend to submit to *Acta Crystallographica Section C* or *E* or *IUCrData*, you should make sure that full publication checks are run on the final version of your CIF prior to submission.

### **Publication of your CIF in other journals**

Please refer to the *Notes for Authors* of the relevant journal for any special instructions relating to CIF submission.

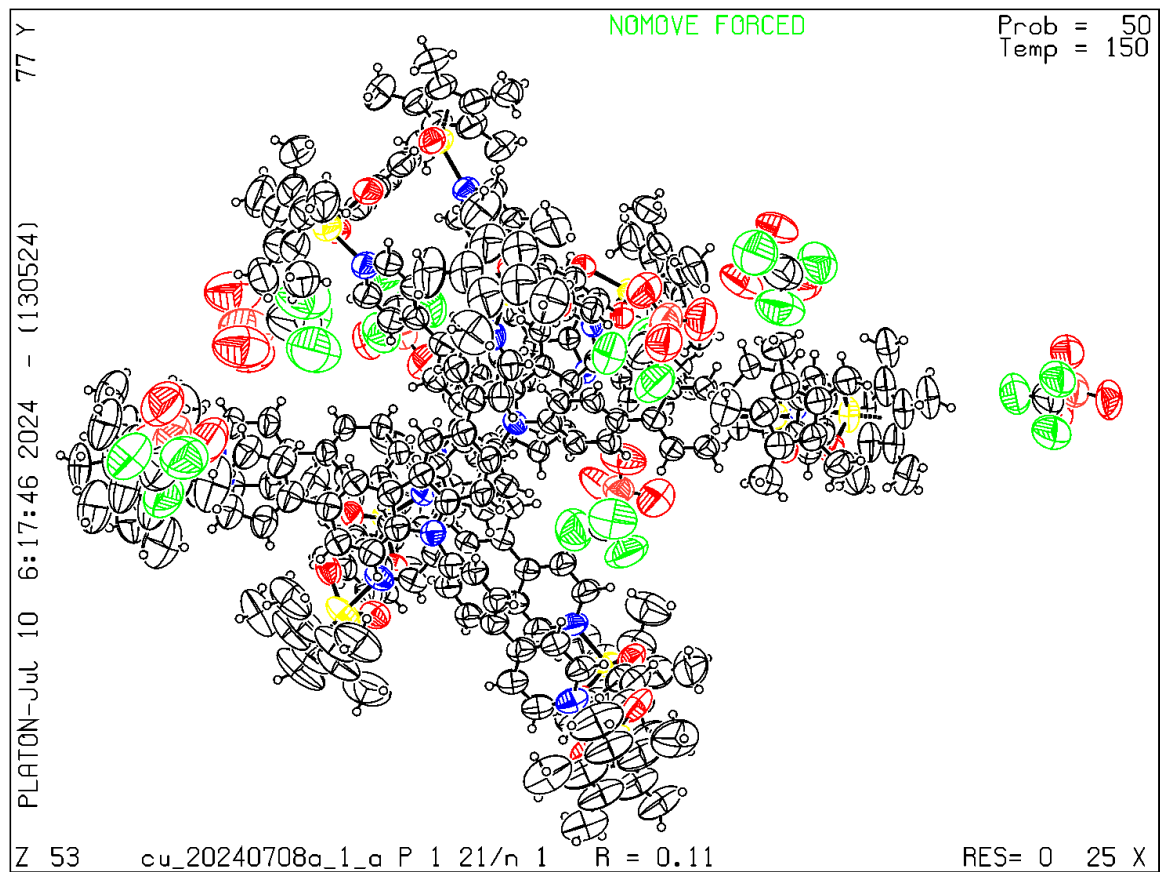

Supplement: Supplementary file 1 [file fde5efe2f23df0a019637831.pdf]
