# Supplementary material for: Highly Selective Synthesis of Interlocked Carbazole-based Cages and their Application in Effective Solar-driven Water Evaporation
Source: Research Square preprint supplement (doi:10.21203/rs.3.rs-5527004/v1), 2024-12-09
Supplement: Supplementary file 1 [file 0a74eb563df37ef7064f99b5.docx]

**Supplementary information for**

**Highly Selective Synthesis of Interlocked Carbazole-based Cages and their Application in Effective Solar-driven Water Evaporation**

Ming-Yu Lu1,2, Jian-Xin Yang1, Ya-Ning Xu3, Yin-Hang Chai1, Xiao-Qian Wan1, Ying Zhao1,*, Dan Tian3,*, Francisco Aznarez1, Li-Long Dang1,2*, and Lu-Fang Ma1,2

1College of Chemistry and Chemical Engineering, Luoyang Normal University, Luoyang 471934, P. R. China. These authors contributed equally: Ming-Yu Lu, Jian-Xin Yang, Ya-Ning Xu.

2College of Chemistry, Zhengzhou University, Zhengzhou 450001, P. R. China.

3Co-Innovation Center of Efficient Processing and Utilization of Forest Resources, College of Materials Science and Engineering, Nanjing Forestry University, Nanjing 210037, P. R. China.

*E-mail: [zhaoyingchem@126.com](mailto:zhaoyingchem@126.com), [tiandan@njfu.edu.cn](mailto:tiandan@njfu.edu.cn) and [danglilong8@163.com](mailto:danglilong8@163.com,)

**Contents**

1. **General considerations** **2**
2. **Synthesis and experimental methods 2**
3. **NMR spectra 7**
4. **Near-infrared photothermal conversion research 17**
5. **Water contact test 26**
6. **X-ray crystallography details 26**
7. **References 31**
8. **General considerations**

All reagents and solvents were purchased from commercial sources and used as supplied unless otherwise mentioned. The starting materials [Cp*RhCl2]2 (Cp* = η5-pentamethylcyclopentadienyl) were prepared by literature methods.1,2 NMR spectra were recorded on Bruker AVANCE I 400 spectrometers at room temperature and referenced to the residual protonated solvent. Proton chemical shifts are reported relative to the solvent residual peak (δ H = 3.31 (CD3OD)). Coupling constants are expressed in Hertz. Elemental analyses were performed on an Elementar Vario EL III analyzer.

1. **Synthesis of compounds 1, 2, 3, 4, 5, 6, 7, 8**

**2.1. Preparation of compound 1 (Molecular-tweezer-like 1)**

IIn order to synthesize building block **E1**, add AgOTf (30.8 mg, 0.12 mmol) and [Cp*RhCl2]2 (18.5 mg, 0.03 mmol) to a (3 mL) methanol . The container containing the mixture was sealed in tin foil and stirred at room temperature for several hours, then the white AgCl precipitate was filtered out by centrifuthe supernatant. Then 2,5-dihydroxycyclohexa-2,5-diene-1,4-dione (16.8 mg, 0.03 mmol) and NaOH (2.4 mg, 0.06 mmol) were added to the filtrate. Then the mixed solution was stirred at room temperature for 8 h to give a earthy brown solution. Building block **E1** was obtained. **L1** (9.6 mg, 0.03 mmol) was added to the solution. The mixture was stirred at room temperature for another 8 h to give a dark earthy brown solution. Finally, the single crystals were grown by liquid diffusion, and the nonpolar solvent ether was added to the mixed solution of methanol and acetontrile,. The product was recrystallized from a diethyl ether mixture to afford earthy brown block-shaped crystals (**1**). Elemental analysis Calcd for C200H188O40N12F24S8Rh8 (Mr=4935.43 ): C, 48.67; H, 3.84; N, 3.41. Found: C, 48.47; H, 3.74; N, 3.31. 1H NMR (500 MHz, CD3OD, ppm, with respect to Cp*Rh): δ = 8.08 (d, 2H, J = 3.5 Hz, pyridyl-Ha), δ = 7.51 (d, 2H, J = 2.0 Hz, pyridyl-Hb), δ = 7.18 (d, 1H, J = 8.5 Hz, carbazolyl-Hd), δ = 6.78 (d, 1H, J = 7.0 Hz, carbazolyl-Hc), δ = 6.69 (s, 1H, carbazolyl-He), δ = 5.97 (s, 1H, benzoquinonyl-Hf), δ = 1.83 (s, 15H, Cp*-Hg).

**2.2. Preparation of compound 2 (Molecular-tweezer-like 2)**

In order to synthesize building block **E2**, add AgOTf (30.8 mg, 0.12 mmol) and [Cp*RhCl2]2 (18.5 mg, 0.03 mmol) to a (3 mL) methanol . The container containing the mixture was sealed in tin foil and stirred at room temperature for several hours, then the white AgCl precipitate was filtered out by centrifuthe supernatant. Then 5,8-dihydroxynaphthalene-1,4-dione (5.7 mg, 0.03 mmol) and NaOH (2.4 mg, 0.06 mmol) were added to the filtrate. Then the mixed solution was stirred at room temperature for 8 h to give a green solution. Building block **E1** was obtained. **L1** (9.6 mg, 0.03 mmol) was added to the solution. The mixture was stirred at room temperature for another 8 h to give a dark green solution. Finally, the single crystals were grown by liquid diffusion, and the nonpolar solvent ether was added to the solution of methanol.The product was recrystallized from a diethyl ether mixture to afford green block-shaped crystals (**2**). Elemental analysis Calcd for C216H196O40N12F24S8Rh8 (Mr=5135.67): C, 50.52; H, 3.85; N, 3.27. Found: C, 50.32; H, 3.75; N, 3.17. 1H NMR (500 MHz, CD3OD, ppm, with respect to Cp*Rh): *δ* = 8.30 (d, 2H, J = 6.0 Hz, pyridyl-Ha), *δ* = 7.51 (d, 2H, J = 6.5 Hz, pyridyl-Hb), *δ* = 7.72 (d, 1H, J = 4.5 Hz, carbazolyl-Hd), *δ* = 7.48 (s, 1H, carbazolyl-He), *δ* = 7.27 (d, 1H, J = 9.5 Hz, carbazolyl-Hc), *δ* = 6.44 (d, 2H, naphthyl -Hf), *δ* = 1.64 (s, 15H, Cp*-Hg).

**2.3. Preparation of compound 3 (Molecular-tweezer-like 3)**

The first step is to add AgOTf (30.8 mg, 0.12 mmol) and [Cp*RhCl2]2 (18.5 mg, 0.03 mmol) to a (3 mL) methanol. The container containing the mixture was sealed in tin foil and stirred at room temperature for several hours, then the white AgCl precipitate was filtered out by centrifuthe supernatant.Subsequently 2,5-dibromo-3,6-dihydroxycyclohexa-2,5-diene-1,4-dione (8.93 mg, 0.03 mmol) and NaOH (2.4 mg, 0.06 mmol) were added to the filtrate. Then the mixed solution was stirred at room temperature for 8 h to give a brown solution, which contains building block **E3**. A suitable pyridine ligand **L1** (9.6 mg, 0.03 mmol) was added to the solution. The mixture was stirred at room temperature for another 8 h to give a dark brown solution. In the end, upon the addition of isopropyl ether, a dark brown solid was precipitated and collected. The product was recrystallized from a diethyl ether mixture to afford dark brown block-shaped crystals (**3**). Elemental analysis Calcd for C200H180O24N12Br8F24S8Rh8 (M = 5130.62): C, 45.23; H, 3.42; N, 3.17. Found: C, 45.13; H, 3.32; N, 3.06. 1H NMR (500 MHz, CD3OD, ppm, with respect to Cp*Rh): *δ* = 8.13 (d, 2H, J = 16.5 Hz, pyridyl-Ha), *δ* = 7.56 (d, 2H, J = 23.5 Hz, pyridyl-Hb), *δ* = 7.18 (d, 1H, J = 60.0 Hz, carbazolyl-Hd), *δ* = 6.77 (d, 1H, J = 35.0 Hz, carbazolyl-Hc), *δ* = 5.96 (s, 1H, carbazolyl-He), *δ* = 1.71 (s, 15H, Cp*-Hg).

**2.4. Preparation of compound 4 (Tetranuclear macrocycle 4)**

The first step is to add AgOTf (30.8 mg, 0.12 mmol) and [Cp*RhCl2]2 (18.5 mg, 0.03 mmol) to a (3 mL) methanol . The container containing the mixture was sealed in tin foil and stirred at room temperature for several hours, then the white AgCl precipitate was filtered out by centrifuthe supernatant.Subsequently 2-(1H-benziMidazol-2-yl)-1H-benziMidazole (7.03 mg, 0.03 mmol) and NaOH (2.4 mg, 0.06 mmol) were added to the filtrate. Then the mixed solution was stirred at room temperature for 8 h to give a yellow solution, which contains building block **E4**. A suitable pyridine ligand **L1** (9.6 mg, 0.03 mmol) was added to the solution. The mixture was stirred at room temperature for another 8 h to give a dark yellow solution. In the end, upon the addition of isopropyl ether, a dark yellow brown solid was precipitated and collected. The product was recrystallized from a diethyl ether mixture to afford dark yellow brown block-shaped crystals (**4**). Elemental analysis Calcd for C116H118O12N14F12S4Rh4 (M =2668.15): C, 52.22; H, 4.46; N, 7.35. Found: C, 52.12; H, 4.36; N, 7.25.

**2.5. Preparation of compound 5 (Interlocked cage 5)**

Firstly, AgOTf (30.8 mg, 0.12 mmol) and [Cp*RhCl2]2 (18.5 mg, 0.03 mmol) were added to (3 ml) methanol at room temperature. The container containing the mixture was sealed in tin foil and stirred at room temperature for several hours, then the white AgCl precipitate was filtered out by centrifuthe supernatant. Then 2,5-dihydroxycyclohexa-2,5-diene-1,4-dione (16.8 mg, 0.03 mmol) and NaOH (2.4 mg, 0.06 mmol) were added to the filtrate. Secondly, the mixed solution was stirred at room temperature for 8 h to give a earthy brown solution.Building block **E1** was obtained. **L2** (9.49 mg, 0.02 mmol) was added to the solution. The mixture was stirred at room temperature for another 8 h to give a dark earthy brown solution. In the end, upon the addition of diethyl ether, a dark earthy solid was precipitated and collected. The product was recrystallized from a diethyl ether mixture to afford dark earthy brown block-shaped crystals (**5**). Elemental analysis Calcd for C300H280O60N16F36S12Rh12 (M = 7373.12): C, 48.87; H, 3.83; N, 3.04. Found: C, 48.67; H, 3.73; N, 2.89. 1H NMR (500 MHz, CD3OD, ppm, with respect to Cp*Rh): *δ* = 8.71 (d, 2H, J = 5.5 Hz, pyridyl-Ha), *δ* = 8.54 (d, 2H, J = 5.5 Hz, pyridyl-Hi), *δ* = 8.14 (d, 2H, J = 5.0 Hz, pyridyl-Hb), *δ* = 8.02 (s, 1H, carbazolyl-He), *δ* = 7.95 (d, 2H, J = 5.5 Hz, carbazolyl-Hh), *δ* = 7.57 (d, 2H, J = 5.0 Hz, phenyl-Hf), *δ* = 7.24 (d, 2H, J = 9.0 Hz, phenyl-Hg), *δ* = 6.90 (d, 1H, J = 5.0 Hz, carbazolyl-Hd), *δ* = 6.35 (d, 1H, J = 8.5 Hz, carbazolyl-Hc), *δ* = 6.04 (s, 1H, benzoquinonyl-Hk), *δ* = 1.85 (s, 15H, Cp*-Hj).

**2.6. Preparation of compound 6 (Interlocked cage 6)**

Firstly, AgOTf (30.8 mg, 0.12 mmol) and [Cp*RhCl2]2 (18.5 mg, 0.03 mmol) were added to (3 ml) methanol at room temperature. The container containing the mixture was sealed in tin foil and stirred at room temperature for several hours, then the white AgCl precipitate was filtered out by centrifuthe supernatant. Then 5,8-dihydroxynaphthalene-1,4-dione (5.7 mg, 0.03 mmol) and NaOH (2.4 mg, 0.06 mmol) were added to the filtrate. Secondly, the mixed solution was stirred at room temperature for 8 h to give a green solution. Building block **E2** was obtained. **L2** (9.49 mg, 0.02 mmol) was added to the solution. The mixture was stirred at room temperature for another 8 h to give a dark green solution. In the end, upon the addition of diethyl ether, a dark green solid was precipitated and collected. The product was recrystallized from a diethyl ether mixture to afford dark green block-shaped crystals (**6**). Elemental analysis Calcd for C312H292O60N16F36S12Rh12 (M =7529.35): C, 49.77; H, 3.91; N, 2.98. Found: C, 49.64; H, 3.83; N, 2.87. 1H NMR (500 MHz, CD3OD, ppm, with respect to Cp*Rh): *δ* = 8.75 (d, 2H, J = 5.0 Hz, pyridyl-Ha), *δ* = 8.56 (d, 2H, J = 7.0 Hz, pyridyl-Hi), *δ* = 8.15 (d, 2H, J = 1.5 Hz, pyridyl-Hb), *δ* = 7.94 (d, 2H, J = 9.0 Hz, carbazolyl-Hh), *δ* = 7.72 (d, 2H, J = 5.5 Hz, phenyl-Hf), *δ* = 6.44 (d, 2H, naphthyl -Hk), *δ* = 7.50 (d, 2H, J = 10.0 Hz, phenyl-Hg), *δ* = 6.63 (d, 1H, J = 8.0 Hz, carbazolyl-Hd), *δ* = 6.59 (s, 1H, carbazolyl-He), *δ* = 6.03 (d, 1H, J = 8.0 Hz, carbazolyl-Hc), *δ* = 6.04 (s, 1H, benzoquinonyl-Hk), *δ* = 1.77 (s, 15H, Cp*-Hj).

**2.7. Preparation of compound 7 (Interlocked cage 7)**

Firstly, an appropriate weight of AgOTf (30.8 mg, 0.12 mmol) and [Cp*RhCl2]2 (18.5 mg, 0.03 mmol) were added into a 3mL methanol solution and stirred at room temperature and away from light for 8 h. Stop stirring until a large amount of white precipitate appears, and remove the precipitate, reserving the filtrate. Subsequently 2,5-dibromo-3,6-dihydroxycyclohexa-2,5-diene-1,4-dione (8.93 mg, 0.03 mmol) and NaOH (2.4 mg, 0.06 mmol) were added to the filtrate. Then the mixed solution was stirred at room temperature for 8 h to give a dark brown solution, which contains building block **E3**. **L2** (9.49 mg, 0.02 mmol) was added to the solution. The mixture was stirred at room temperature for another 8 h to give a dark dark brown solution. Then, upon the addition of diethyl ether, a dark brown solid was precipitated and collected. The product was recrystallized from a diethyl ether to afford complex (**7**). Elemental analysis Calcd for C300H268O60N16F36S12Br12Rh12 (M = 8319.87): C, 43.31; H, 3.25; N, 2.69. Found: C, 43.21; H, 3.15; N, 2.59. 1H NMR (500 MHz, CD3OD, ppm, with respect to Cp*Rh): *δ* = 8.64 (d, 2H, J = 6.0 Hz, pyridyl-Ha), *δ* = 8.46 (d, 2H, J = 6.0 Hz, pyridyl-Hi), *δ* = 8.09 (d, 2H, J = 4.0 Hz, pyridyl-Hb), *δ* = 8.15 (d, 2H, J = 6.5 Hz, carbazolyl-Hh), *δ* = 8.04 (s, 1H, carbazolyl-He), *δ* = 7.88 (d, 2H, J = 8.0 Hz, phenyl-Hf), *δ* = 6.51 (d, 2H, J = 8.0 Hz, phenyl-Hg), *δ* = 6.26 (d, 1H, J = 8.5 Hz, carbazolyl-Hd), *δ* = 5.50 (d, 1H, J = 9.0 Hz, carbazolyl-Hc), *δ* = 1.93 (s, 15H, Cp*-Hj).

**2.8. Preparation of compound 8 (****Hexanuclear cage 8)**

Firstly, an appropriate weight of AgOTf (30.8 mg, 0.12 mmol) and [Cp*RhCl2]2 (18.5 mg, 0.03 mmol) were added into a 3ml methanol solution and stirred at room temperature and away from light for 8 h. Stop stirring until a large amount of white precipitate appears, and remove the precipitate, reserving the filtrate. Subsequently 2-(1H-benziMidazol-2-yl)-1H-benziMidazole (7.03 mg, 0.03 mmol) and NaOH (2.4 mg, 0.06 mmol) were added to the filtrate. Then the mixed solution was stirred at room temperature for 8 h to give a yellow solution, which contains building block **E4**. **L2** (9.49 mg, 0.02 mmol) was added to the solution. The mixture was stirred at room temperature for another 8 h to give a dark yellow solution. Then, upon the addition of diethyl ether, a dark yellow solid was precipitated and collected. The product was recrystallized from a diethyl ether mixture to afford complex (8). Elemental analysis Calcd for C182H182N20F18S6O18Rh6 (M = 4089.34): C, 53.46; H, 4.49; N, 6.85. Found: C, 53.36; H, 4.39; N, 6.75. 1H NMR (500 MHz, CD3OD, ppm, with respect to Cp*Rh): *δ* = 8.23 (d, 2H, J = 5.5 Hz, pyridyl-Ha), *δ* = 8.16 (d, 2H, J = 6.5 Hz, pyridyl-Hi), *δ* = 8.02 (d, 2H, J = 5.5 Hz, phenyl-Hk), *δ* = 7.72 (d, 2H, J = 6.5 Hz, pyridyl-Hb), *δ* = 7.60 (d, 2H, J = 4.5 Hz, carbazolyl-Hh), *δ* = 7.58 (d, 2H, J = 5.5 Hz, phenyl-Hl), *δ* = 7.29 (s, 1H, carbazolyl-He), *δ* = 7.92 (d, 2H, J = 6.5 Hz, phenyl-Hf), *δ* = 7.31 (d, 2H, J = 6.5 Hz, phenyl-Hg), *δ* = 7.22 (d, 1H, J = 8.0 Hz, carbazolyl-Hd), *δ* = 7.11 (d, 1H, J = 8.5 Hz, carbazolyl-Hc), *δ* = 1.93 (s, 15H, Cp*-Hj).

1. **NMR Spectra**

**
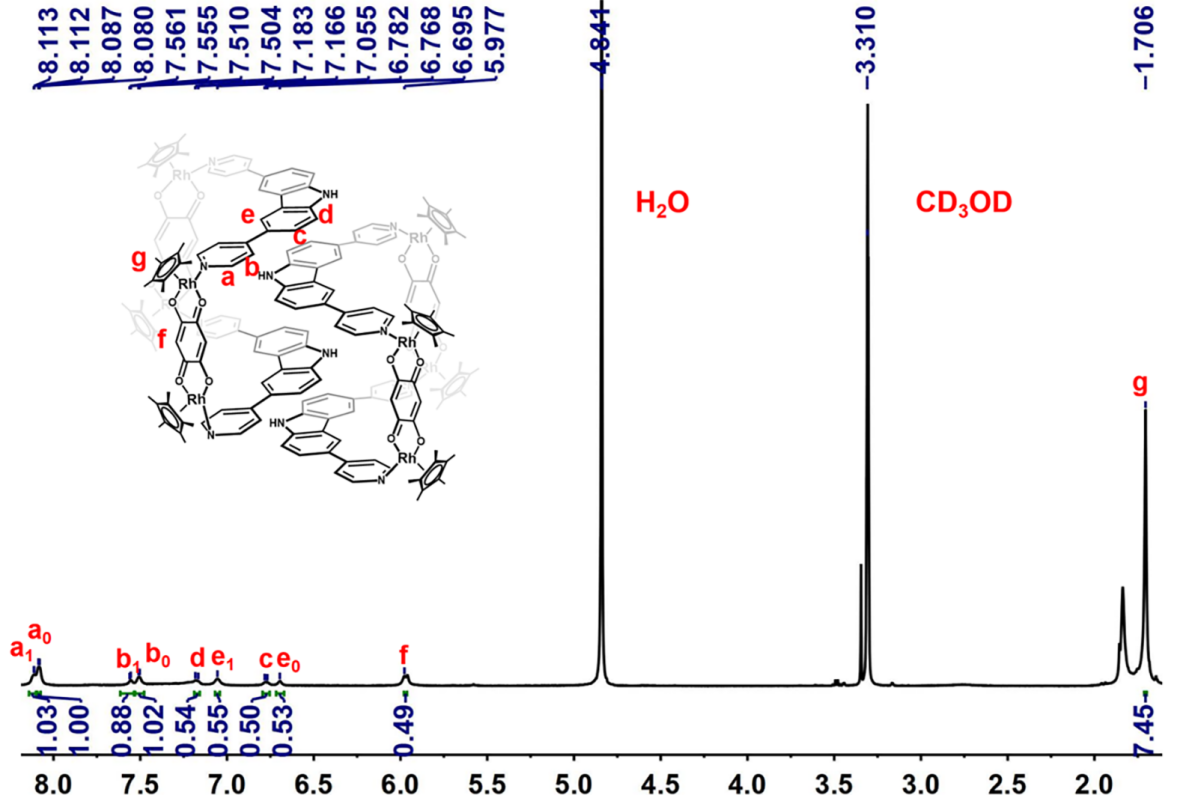
**

**Supplementary Figure 1.** The 1H NMR (500 MHz, CD3OD, ppm) for Molecular-tweezer-like **1** (24.5 mM, with respect to Cp*Rh).


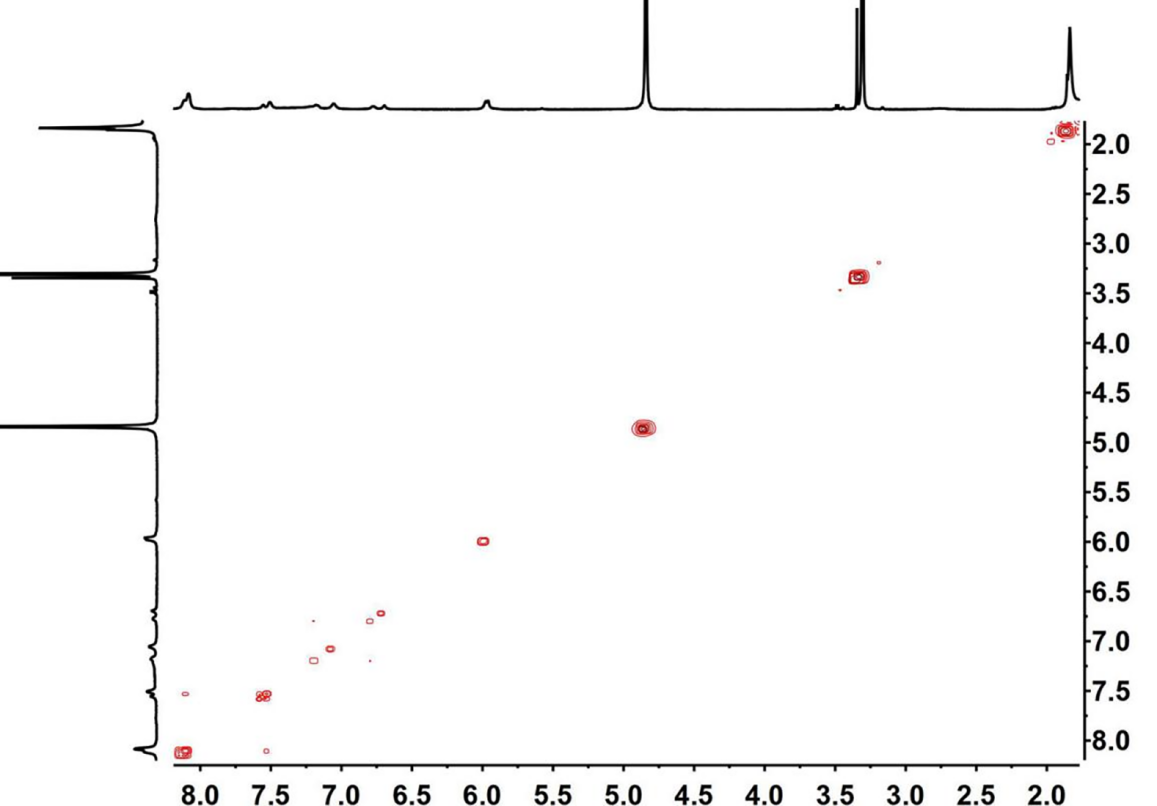


**Supplementary Figure 2.** The 1H-1H COSY NMR (500 MHz, CD3OD, ppm) for Molecular-tweezer-like **1** (24.5 mM, with respect to Cp*Rh).


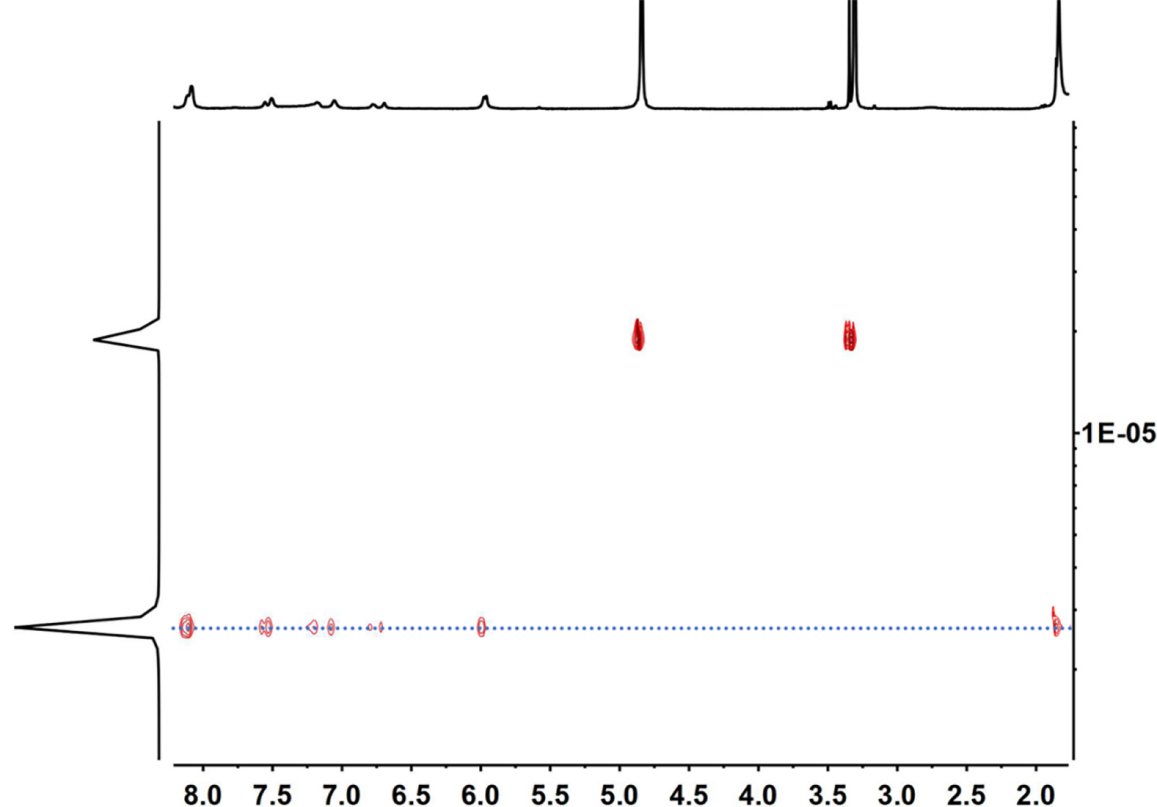


**Supplementary Figure 3.** The 1H DOSY NMR (500 MHz, CD3OD, ppm) for Molecular-tweezer-like **1** (2.59 × 10-6 cm2/s) (24.5 mM, with respect to Cp*Rh).


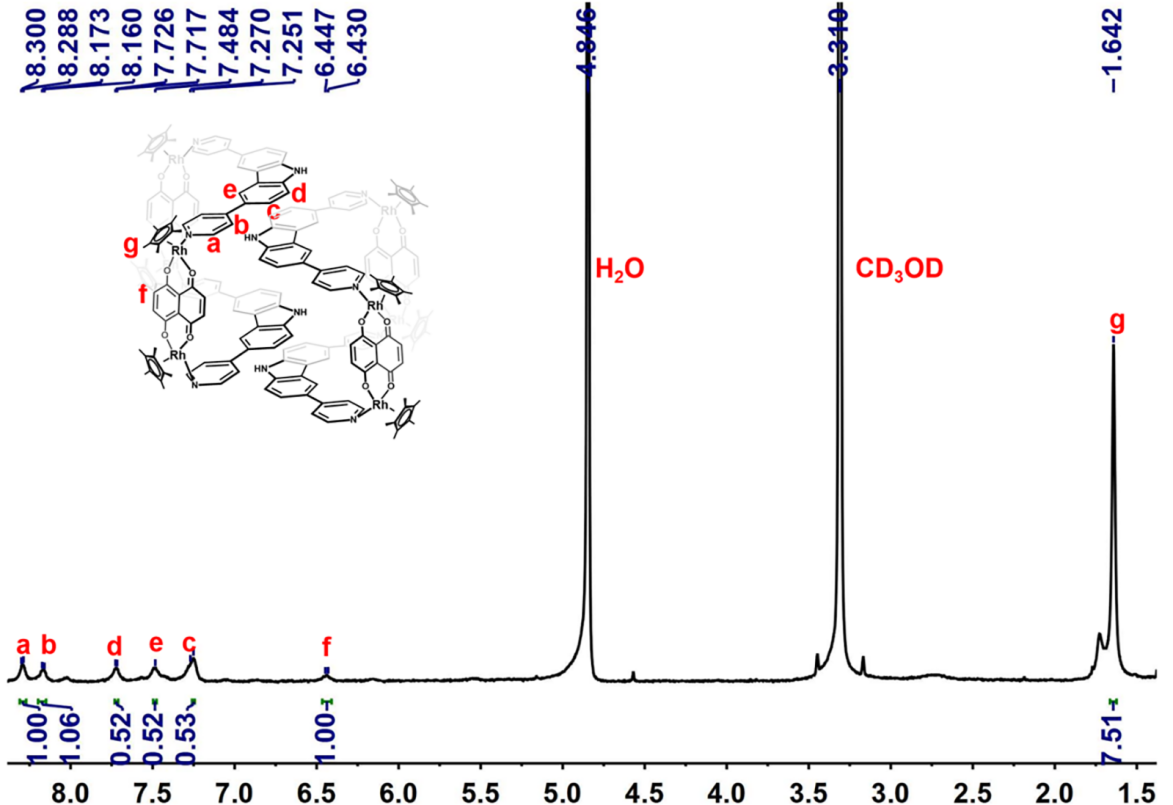


**Supplementary Figure 4.** The 1H NMR (500 MHz, CD3OD, ppm) for Molecular-tweezer-like **2** (24.5 mM, with respect to Cp*Rh).


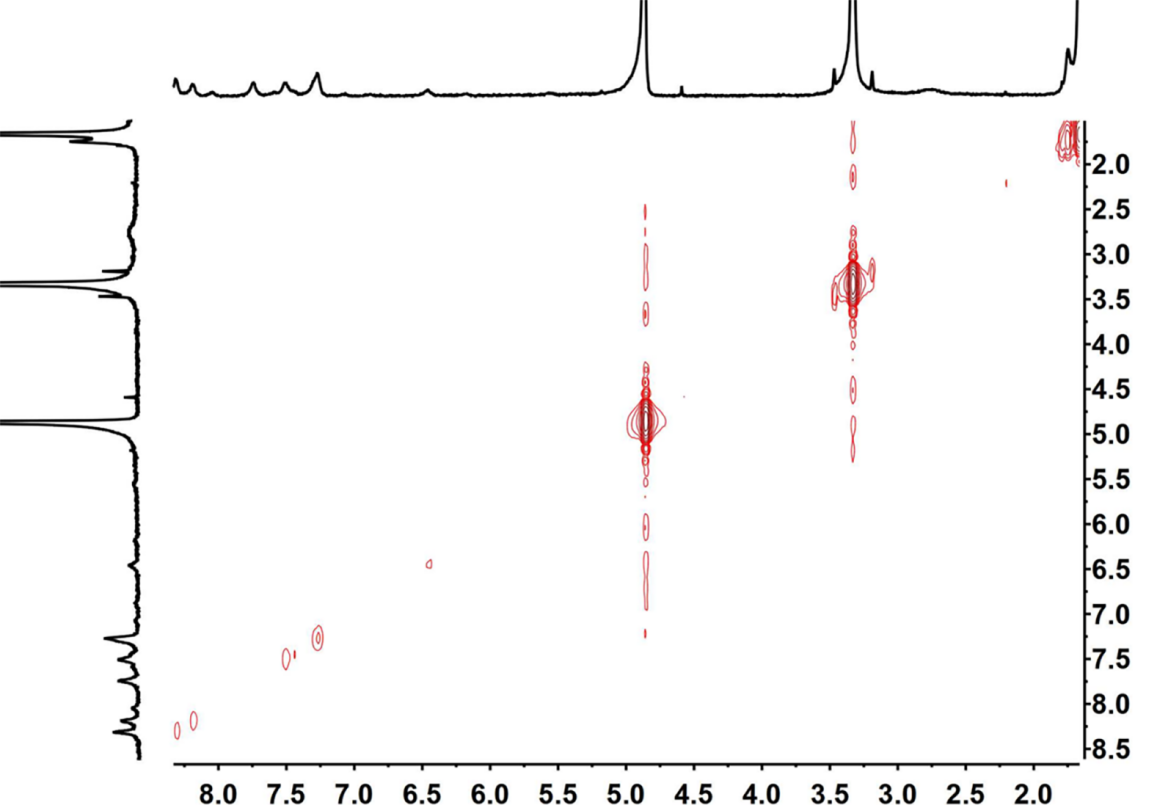


**Supplementary Figure 5.** The 1H-1H COSY NMR (500 MHz, CD3OD, ppm) for Molecular-tweezer-like **2** (24.5 mM, with respect to Cp*Rh).


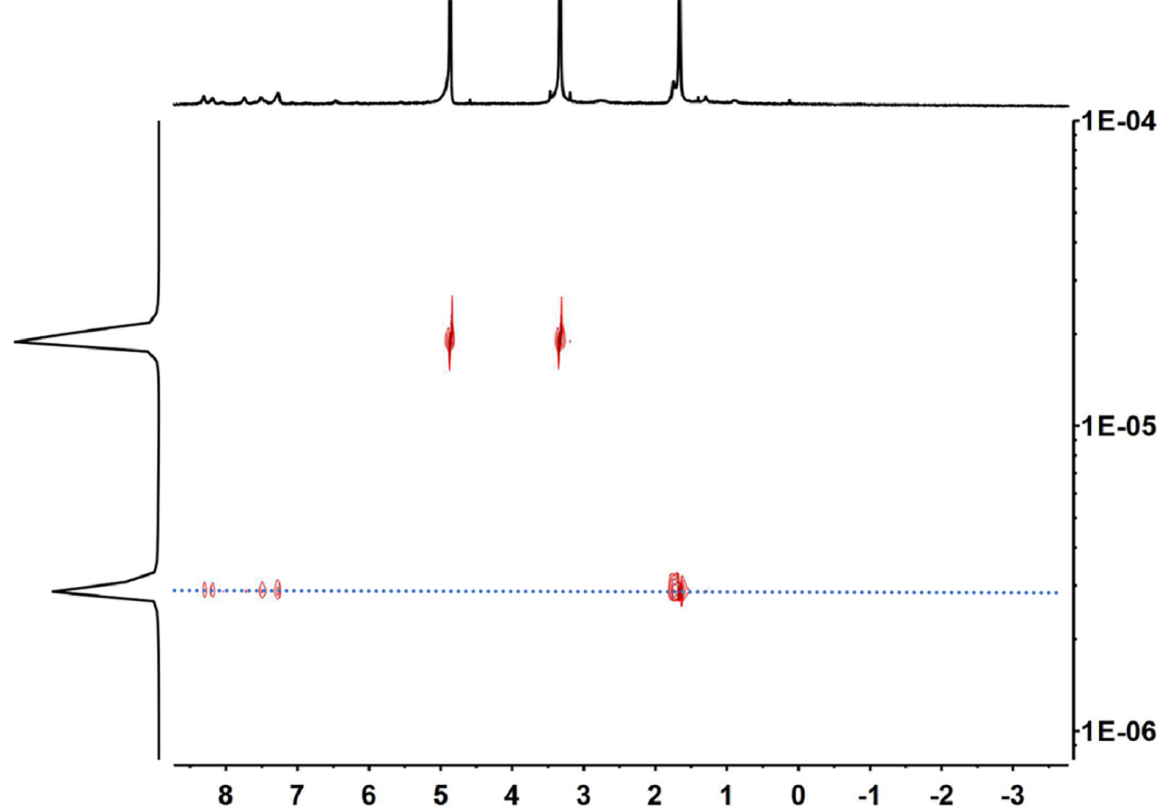


**Supplementary Figure 6.** The 1H DOSY NMR (500 MHz, CD3OD, ppm) for Molecular-tweezer-like **2** (2.65 × 10-6 cm2/s) (24.5 mM, with respect to Cp*Rh).


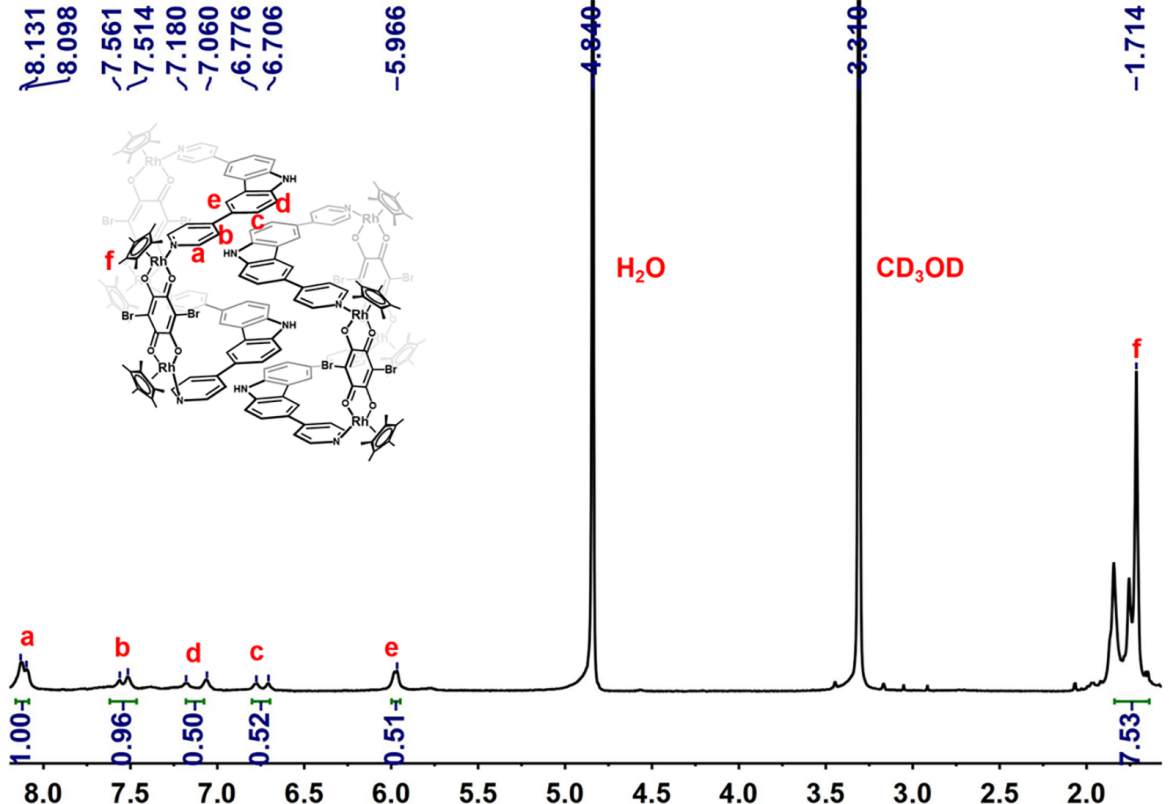


**Supplementary Figure 7.** The 1H NMR (500 MHz, CD3OD, ppm) for Molecular-tweezer-like **3** (24.5 mM, with respect to Cp*Rh).


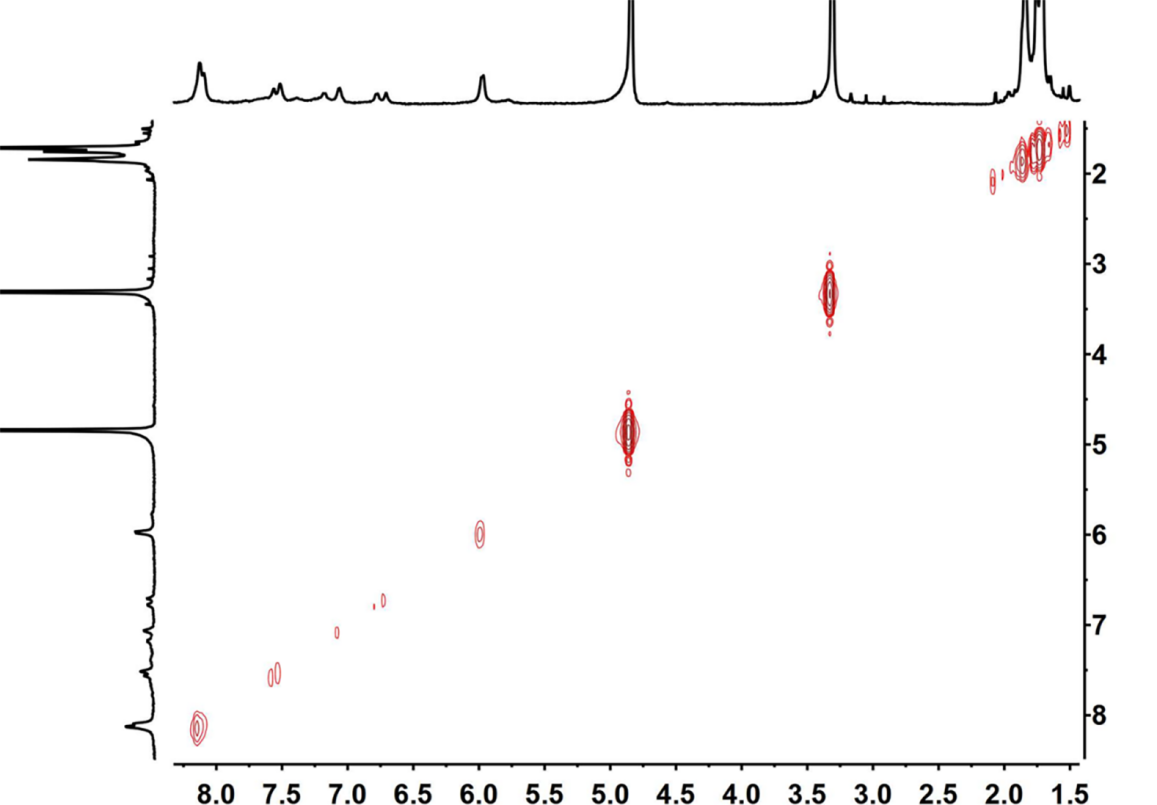


**Supplementary Figure 8.** The 1H-1H COSY NMR (500 MHz, CD3OD, ppm) for Molecular-tweezer-like **3** (24.5 mM, with respect to Cp*Rh).


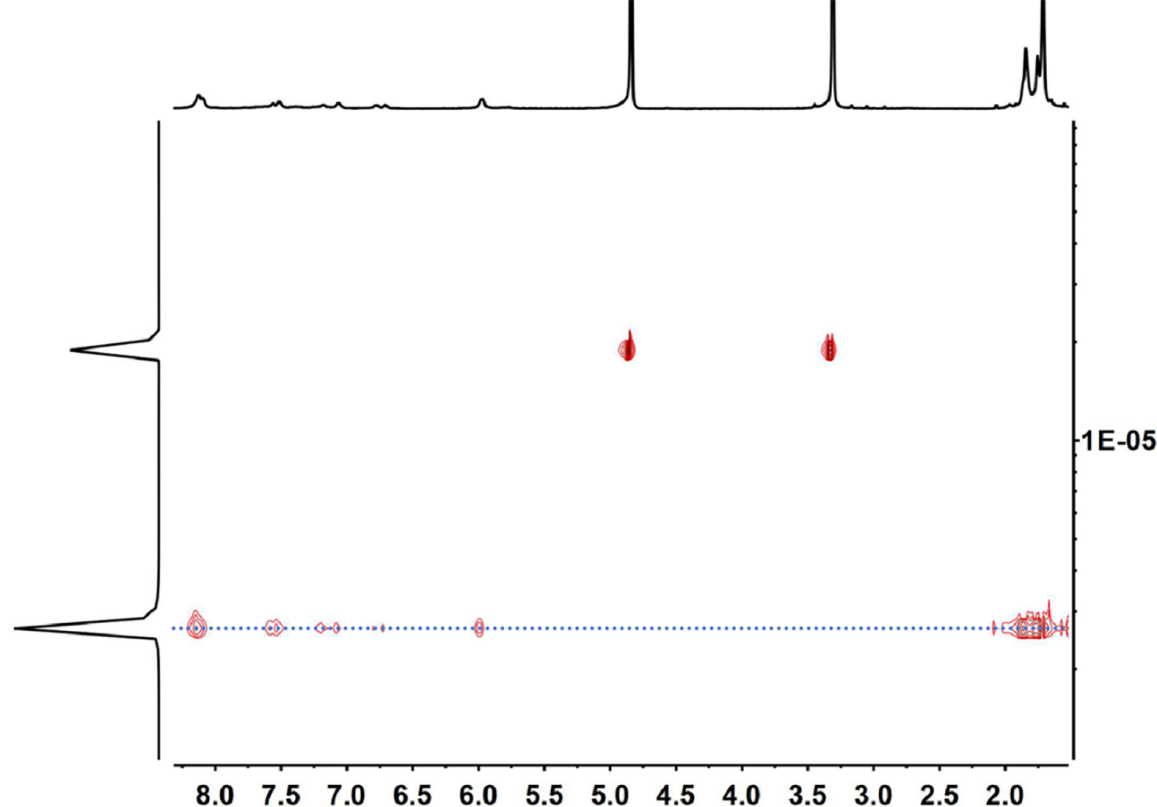


**Supplementary Figure 9.** The 1H DOSY NMR (500 MHz, CD3OD, ppm) for Molecular-tweezer-like **3** (2.49 × 10-6 cm2/s) (24.5 mM, with respect to Cp*Rh).


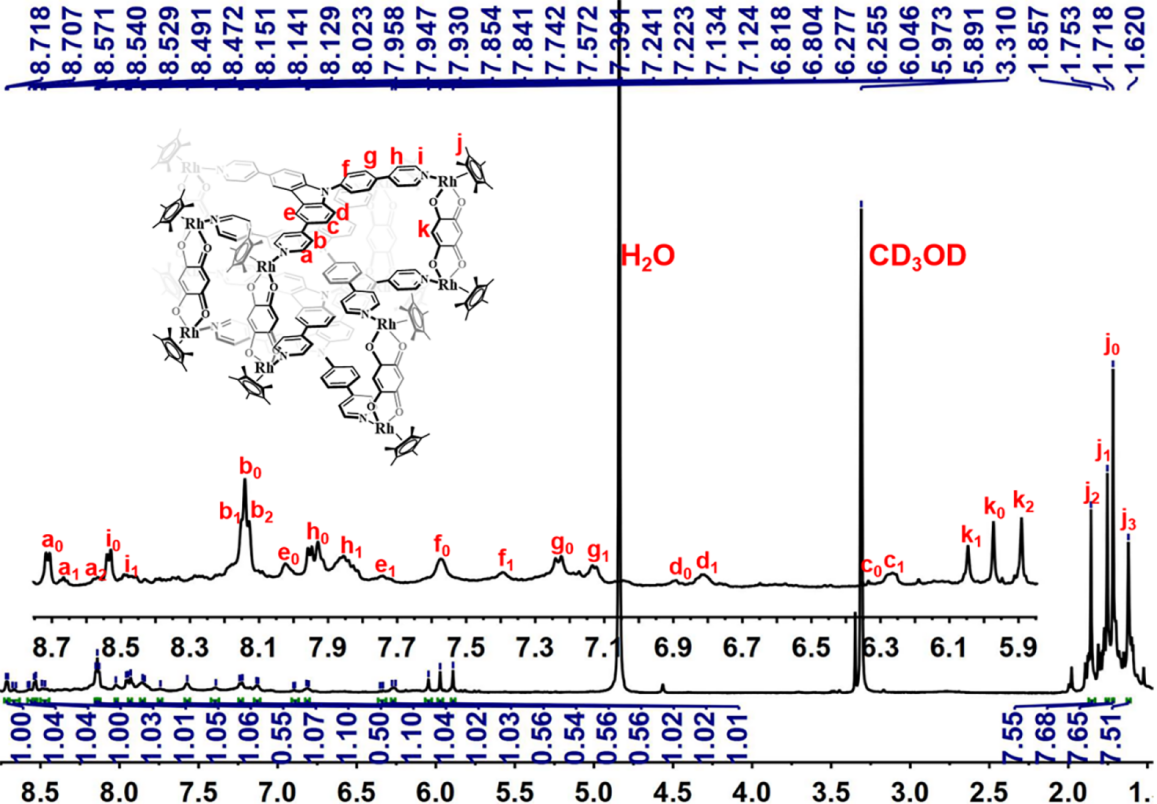


**Supplementary Figure 10.** The 1H NMR (500 MHz, CD3OD, ppm) for Interlocked cage **5** (19.5 mM, with respect to Cp*Rh).


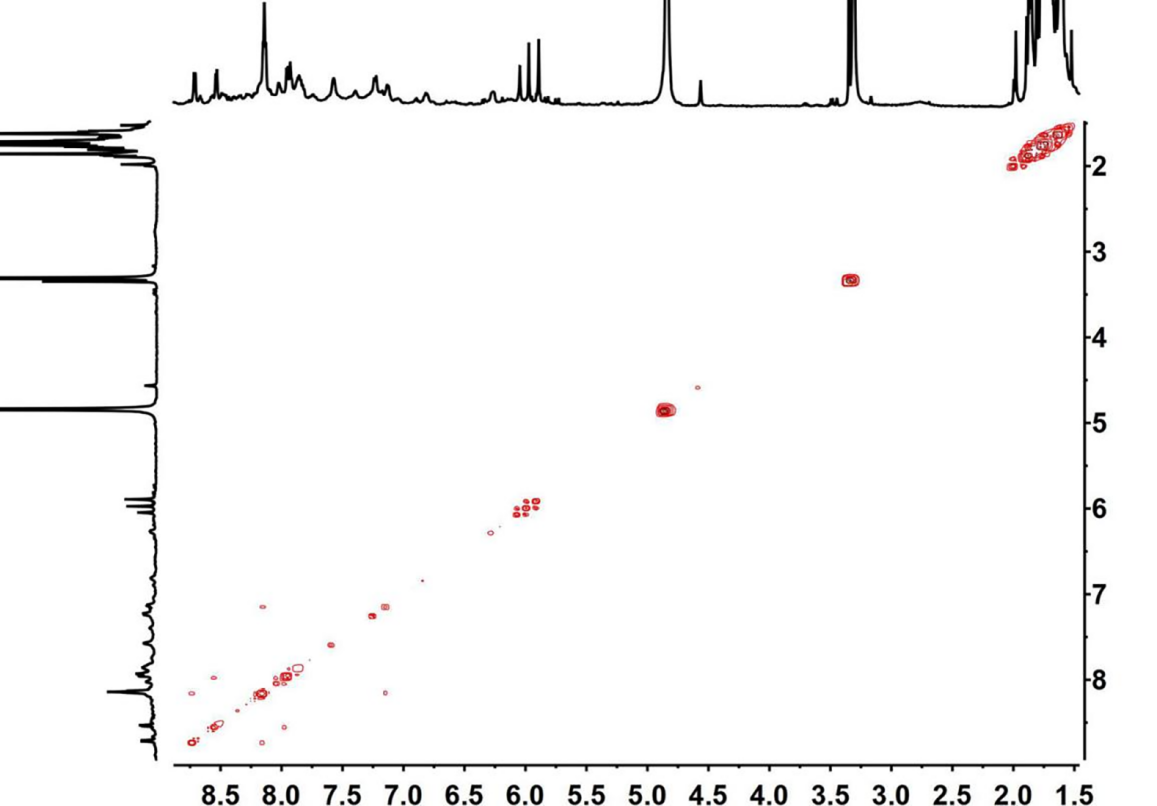


**Supplementary Figure 11.** The 1H-1H COSY NMR (500 MHz, CD3OD, ppm) for Interlocked cage **5** (19.5 mM, with respect to Cp*Rh).


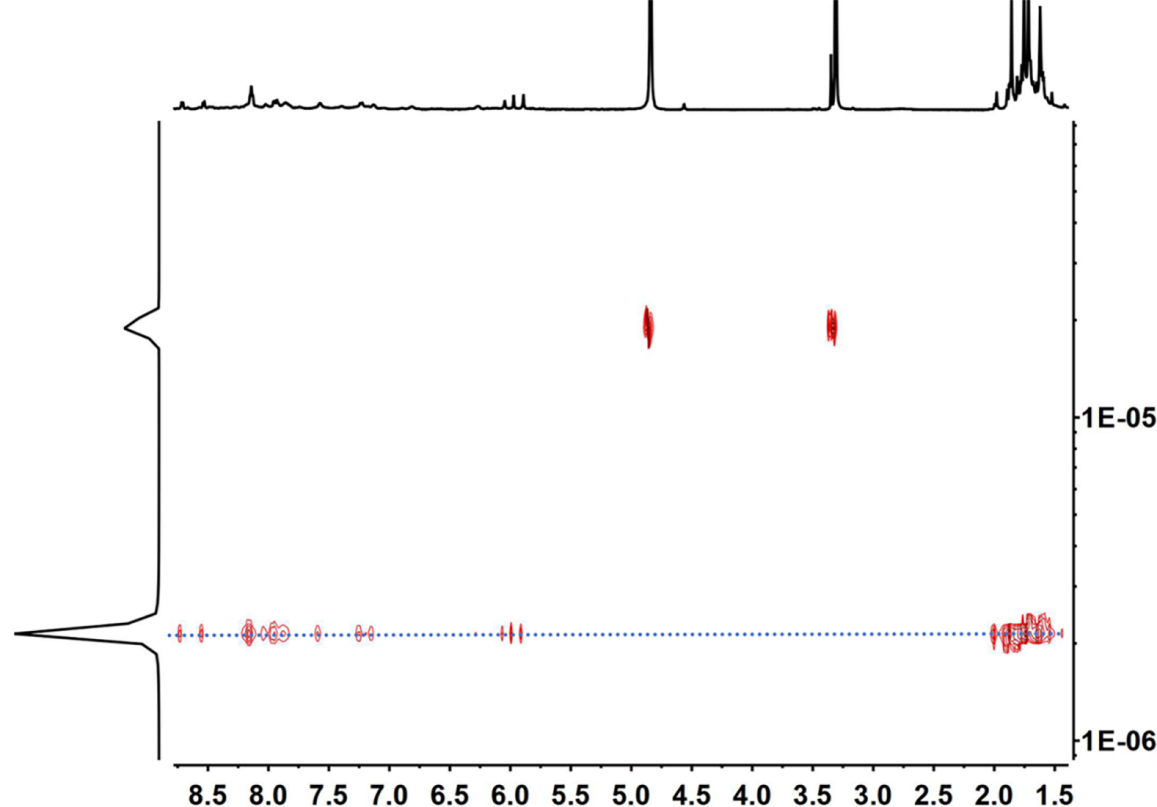


**Supplementary Figure 12.** The 1H DOSY NMR (500 MHz, CD3OD, ppm) for Interlocked cage **5** (2.05 × 10-6 cm2/s) (19.5 mM, with respect to Cp*Rh).


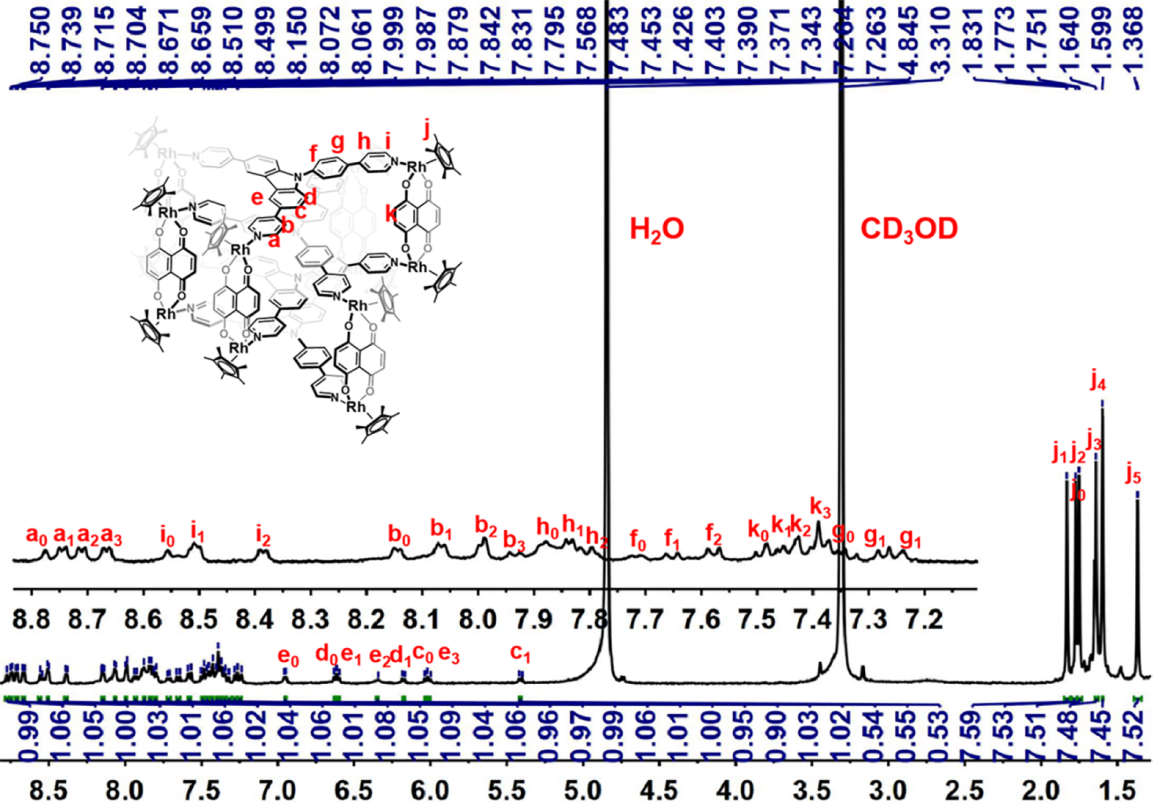


**Supplementary Figure 13.** The 1H NMR (500 MHz, CD3OD, ppm) for Interlocked cage **6** (19.5 mM, with respect to Cp*Rh).


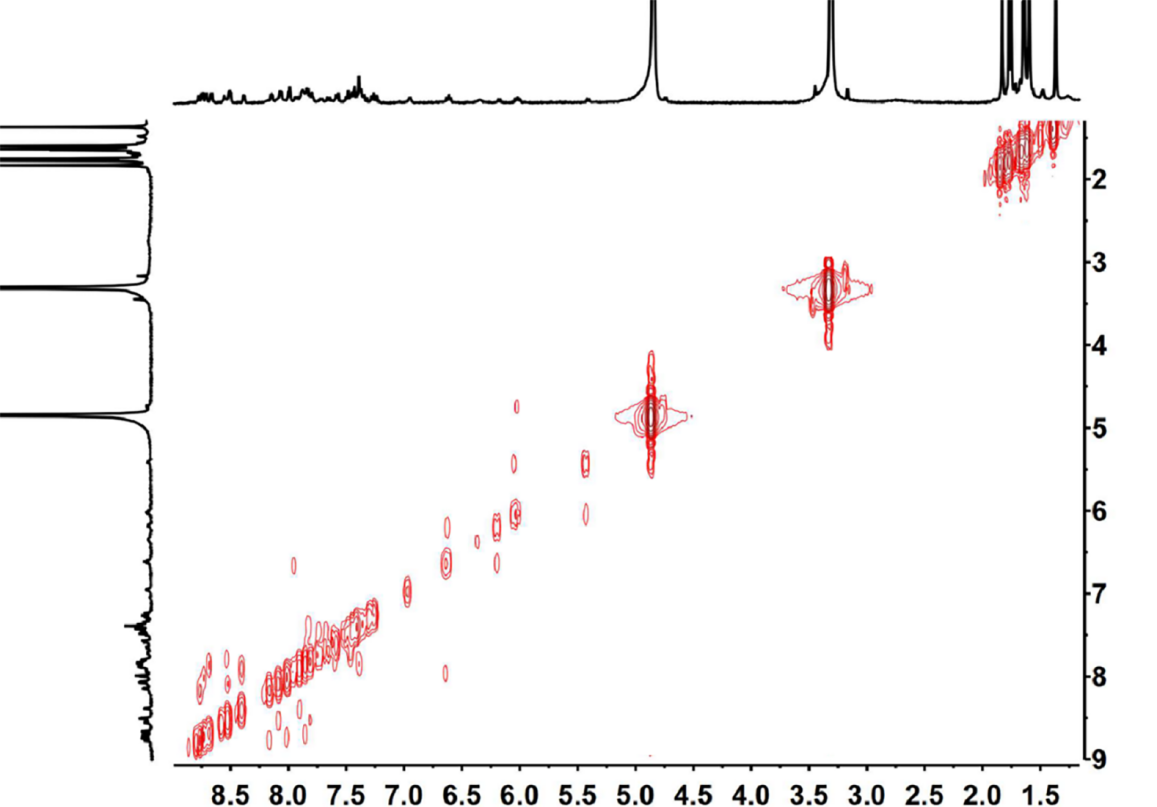


**Supplementary Figure 14.** The 1H-1H COSY NMR (500 MHz, CD3OD, ppm) for Interlocked cage **6** (19.5 mM, with respect to Cp*Rh).


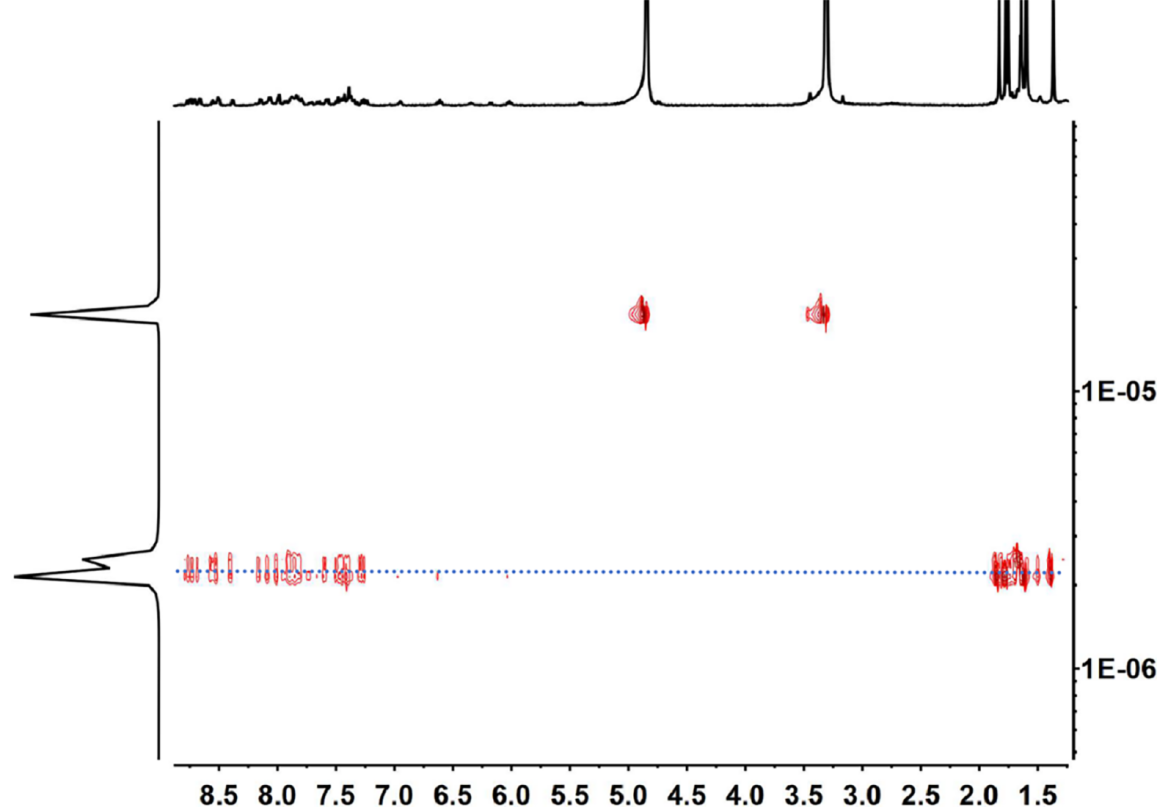


**Supplementary Figure 15.** The 1H DOSY NMR (500 MHz, CD3OD, ppm) for Interlocked cage **6** (2.05 × 10-6 cm2/s) (19.5 mM, with respect to Cp*Rh).


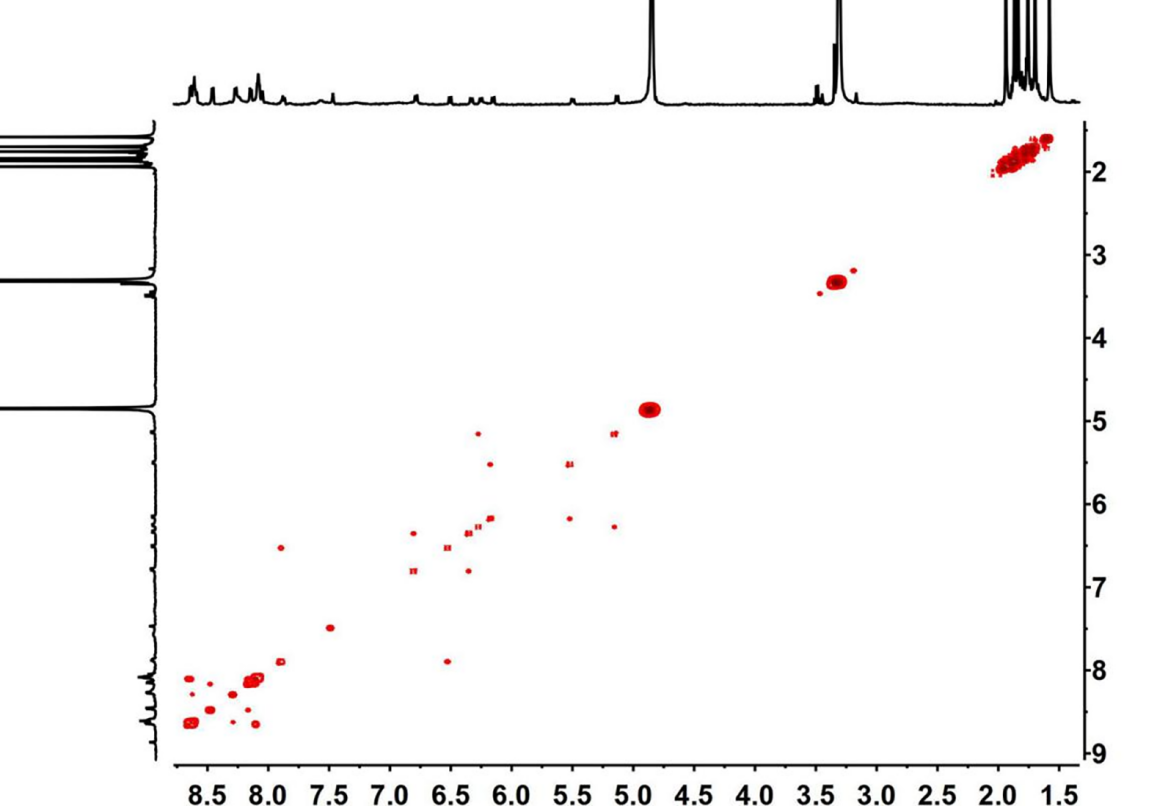


**Supplementary Figure 16.** The 1H-1H COSY NMR (500 MHz, CD3OD, ppm) for Interlocked cage **7** (19.5 mM, with respect to Cp*Rh).


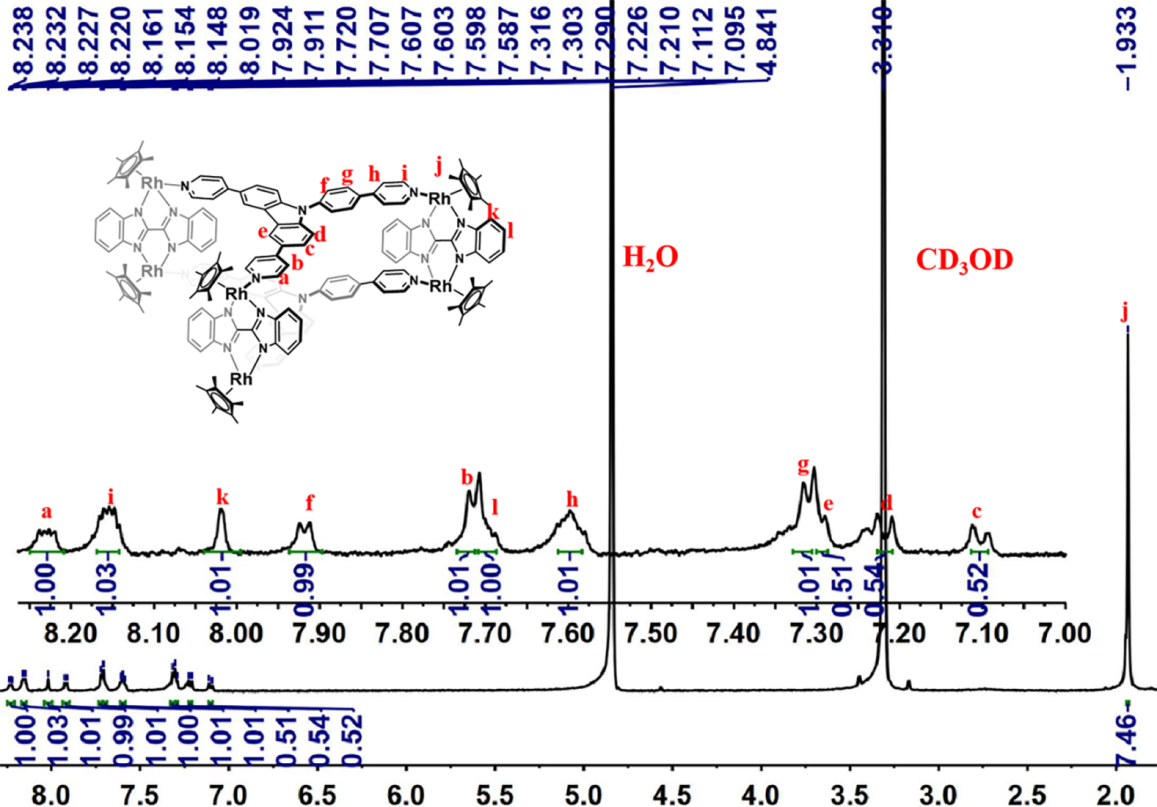


**Supplementary Figure 17.** The 1H NMR (500 MHz, CD3OD, ppm) for Hexanuclear cage **8** (20.5 mM, with respect to Cp*Rh).


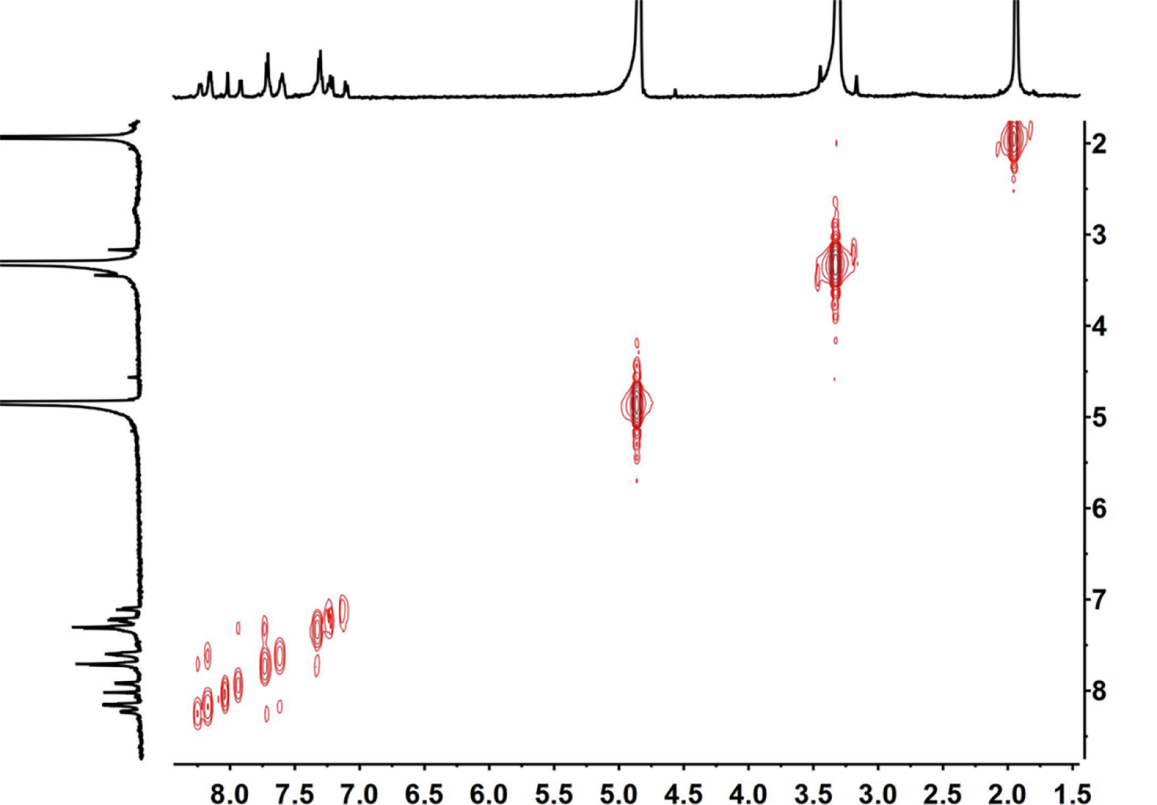


**Supplementary Figure 18.** The 1H-1H COSY NMR (500 MHz, CD3OD, ppm) for Hexanuclear cage **8** (20.5 mM, with respect to Cp*Rh).


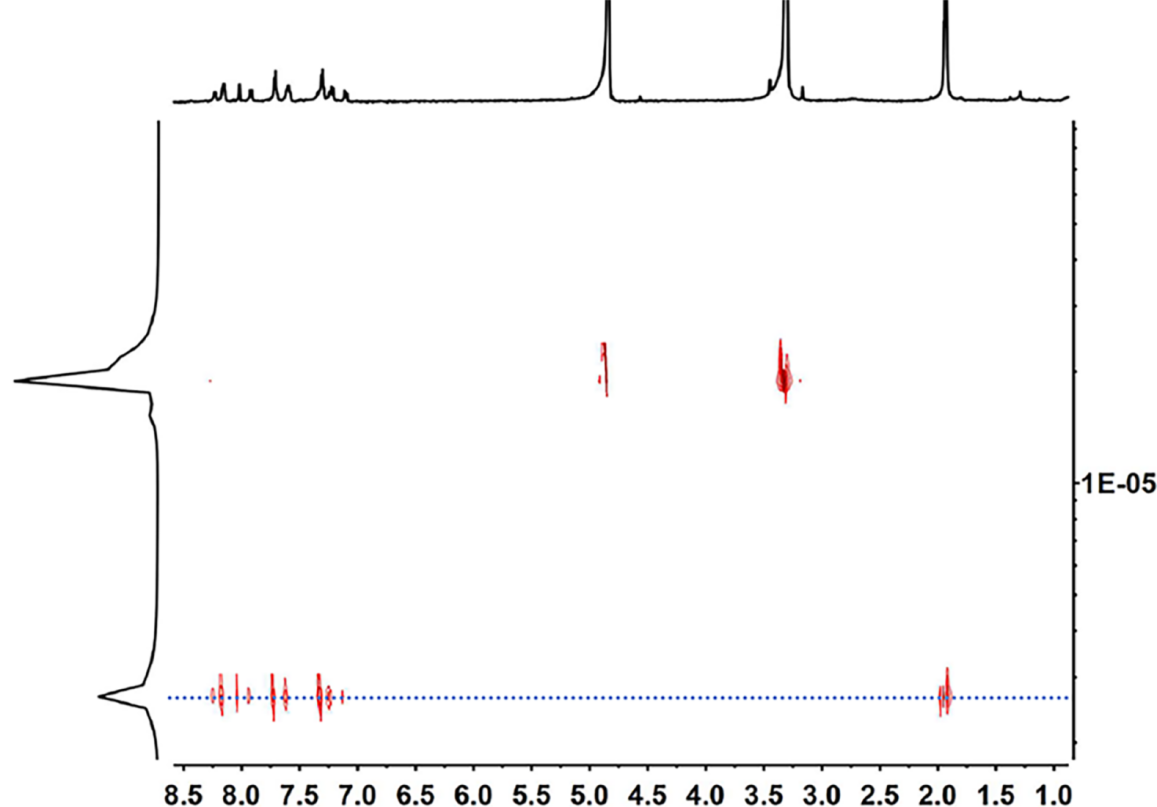


**Supplementary Figure 19.** The 1H DOSY NMR (500 MHz, CD3OD, ppm) for Hexanuclear cage **8** (2.69 × 10-6 cm2/s) (20.5 mM, with respect to Cp*Rh).


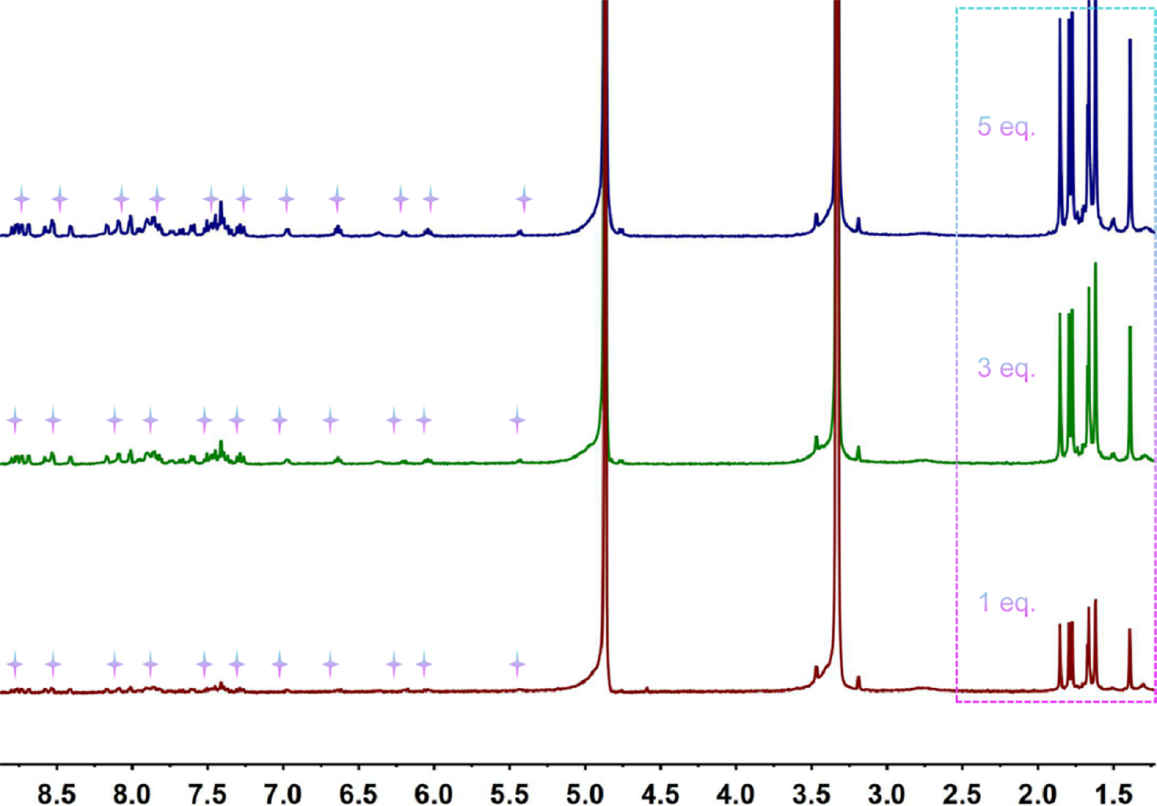


**Supplementary Figure 20.** 1H NMR spectrum (500 MHz, CD3OD, ppm) of showing stability in Interlocked cage **6** uponincreasing of compounds from 1 eq. to 5 eq. (25.0 mM, with respect to Cp*Rh).

1. **Near-infrared photothermal conversion research**

**Experimental details**

To guarantee same amount of conjugated-π area, the applied molar ratio of the three topologies **5 /** **6** / **7** was 1 : 1 : 1. Compound **5** (14.01 mg, 0.0019 mmol)，Compound **6** (14.31 mg, 0.0019 mmol) and Compound **7** (15.81 mg, 0.0019 mmol) were added into a solvent of CH3OH (5ml). After the solid dissolved absolutely, 3.0 ml of this solution was taken into quartz spectrophotometer cell (1 × 1 × 5 cm) to measure its absorbance and put into the bright spot of a laser with 730 nm wavelength at different current intensities. Temperature variation of the solution was detected by an infrared camera.

The methanol solution in each contained complex **5**, **6**, **7**, were put a 0.7 ml sample vessel. And then, they were put under a laser and temperature variation were detected by a same infrared camera. Equations used to calculate near-infrared photothermal conversion efficiency were exhibited as follows:

**η = hS(ΔTsample–ΔTsolvent) / *I*(1-10-A) (1)**

**hS = ∑mCp/τs (2)**

**τs = -t/lnθ (3)**

**θ = (Tamb–T)/(Tamb–Tmax)(4)**

Thereinto, **Cp** = 2.51 KJ/(Kg·K), ΔTsolvent = 2.2 ℃. **I** = 0.6 W/cm2, **h** is the heat transfer coefficient and **S** is the surface area of the container. **τs** is the sample system time constant, m is the mass of the products,Thus, ∑mCp = m (methanol) Cp(methanol) = ρ(methanol) V(methanol) Cp(methanol) = 0.791×0.7×2.51 = 1.3898 J·K-1.

ΔTsolvent = 2.2 ℃. where *I* is the laser power and *A730* is the absorbance of the samples at the wavelength of 730 nm.

Strictly speaking, volume of mixed solvent was not simple addition of two component. However, the deviation was small enough to ignore it.


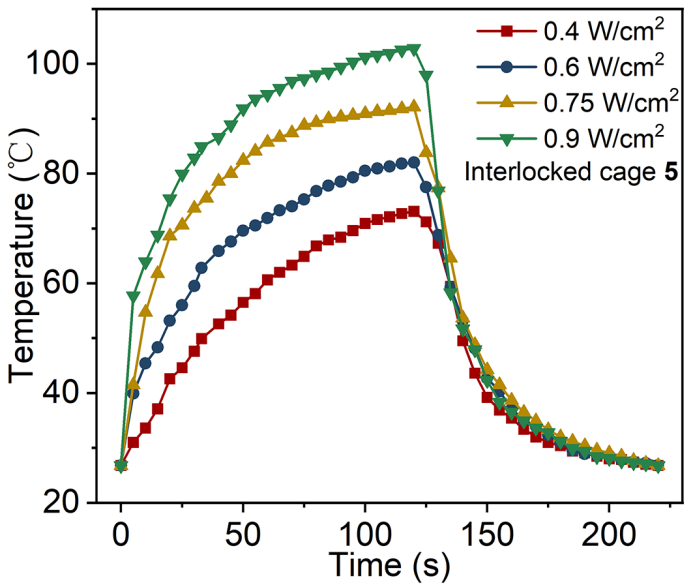


**Supplementary Figure 21.** NIR photothermal conversion curves of Interlocked cage **5** (solid)

**
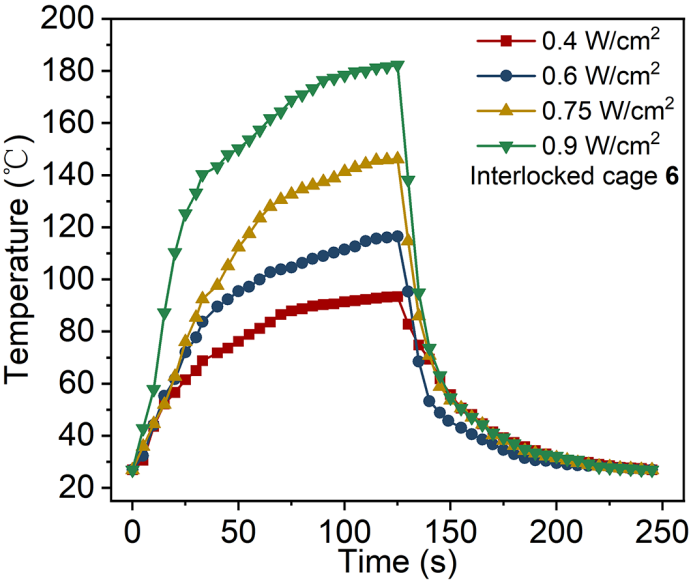
**

**Supplementary Figure 22.** NIR photothermal conversion curves of Interlocked cage **6** (solid)

**
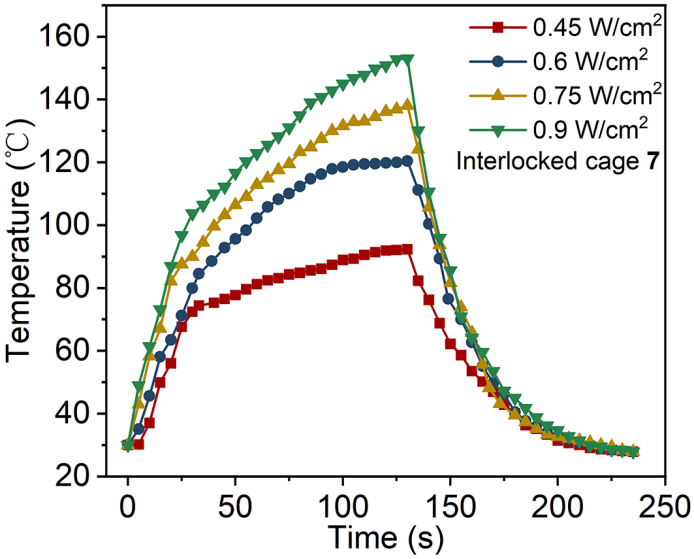
**

**Supplementary Figure 23.** NIR photothermal conversion curves of Interlocked cage **7** (solid)


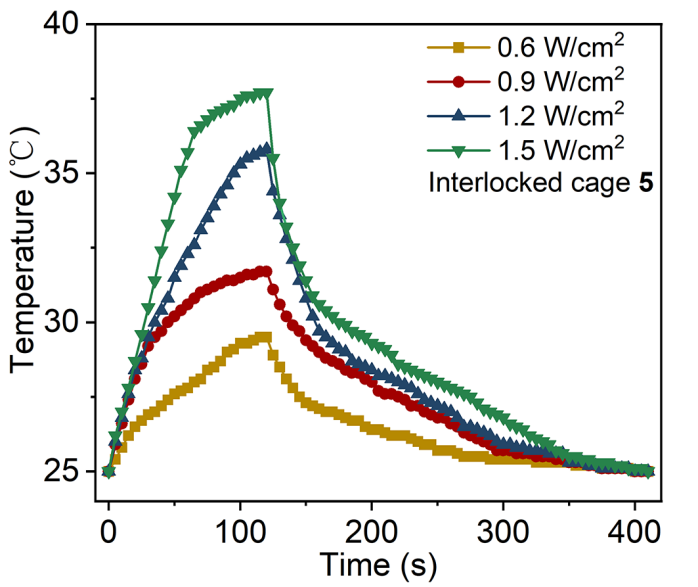


**Supplementary Figure 24.** NIR photothermal conversion curves of Interlocked cage **5** (in CH3OH)

**
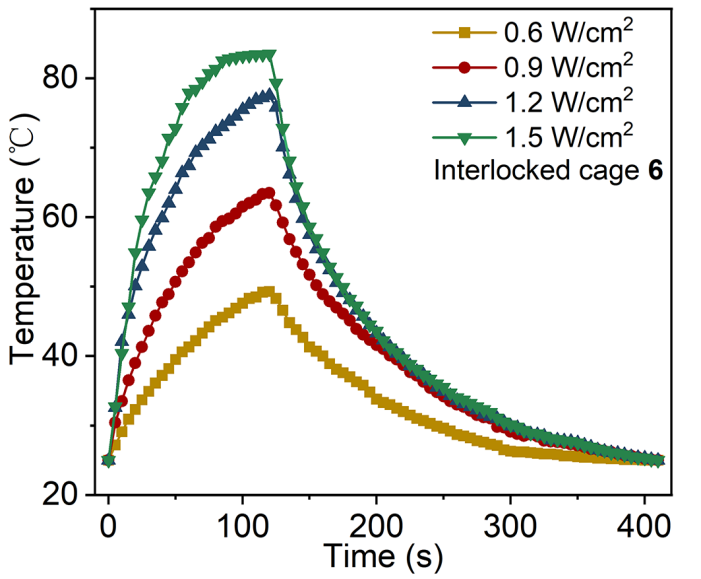
**

**Supplementary Figure 25.** NIR photothermal conversion curves of Interlocked cage **6** (in CH3OH)

**
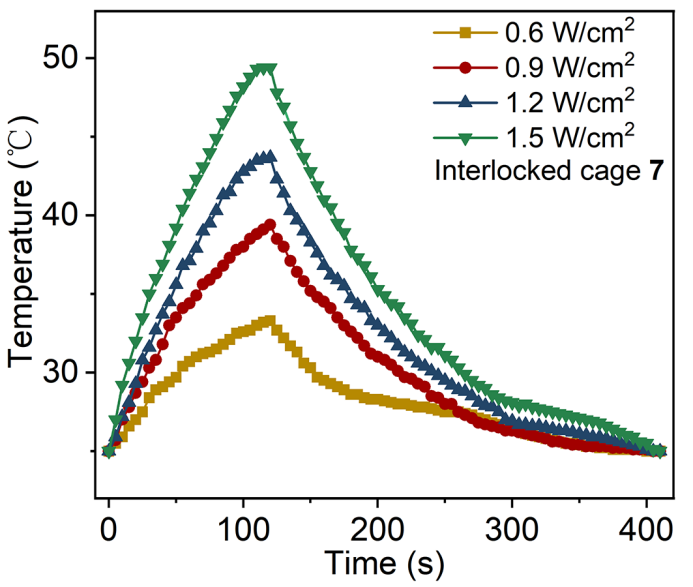
**

**Supplementary Figure 26.** NIR photothermal conversion curves of Interlocked cage **7** (in CH3OH)


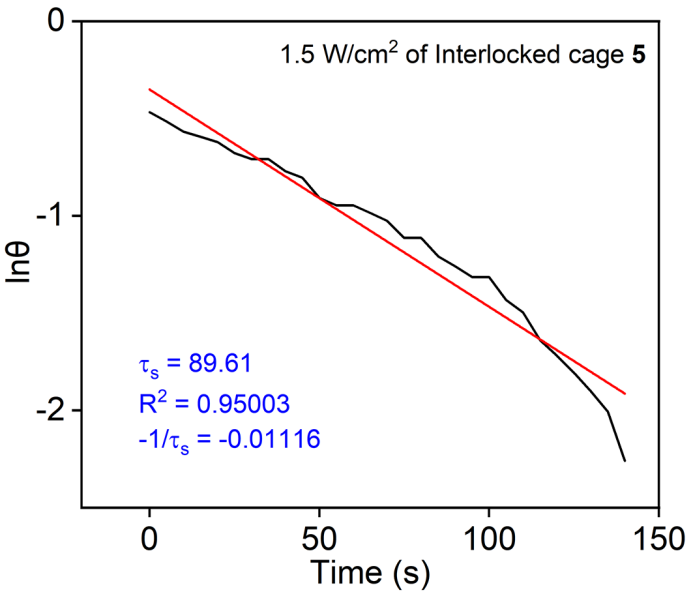


**Supplementary Figure 27.** Fitting linear of lnθ-t of **1.5** W/cm2 of Interlocked cage **5** in methanol.

Near-infrared photothermal conversion efficiency η of **5** of **1.5** W/cm2 was calculated by equations above. A fitting linear of lnθ-t was obtained by Eqs (3) and (4), by which τs was calculated as 89.61 s. Thus, hS = 1.3898/89.61 = 1.55 × 10-2 J·K-1·S-1. ΔTsample = 12.7 ℃ (37.7 - 25). A5 = 0.336 (Fig. 4d in main text). η5 = 1.55 × 10-2 × (12.7 – 2.2)/[1.5 × (1 – 10-0.336)] = 20.1 %.


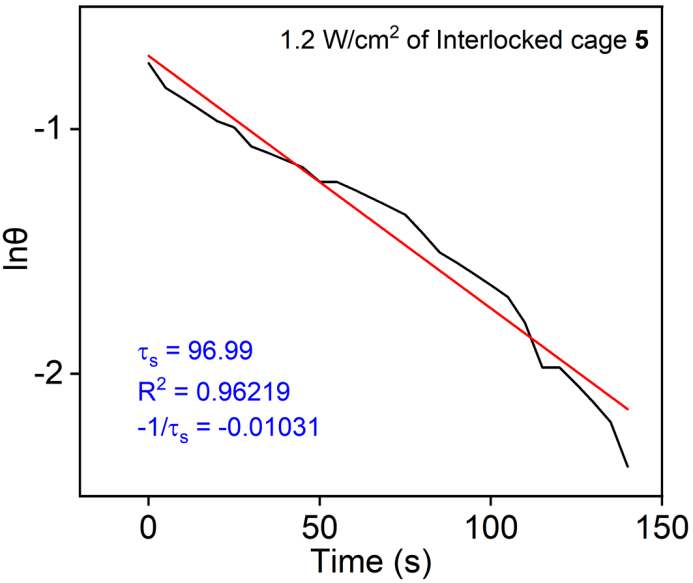


**Supplementary Figure 28.** Fitting linear of lnθ-t of **1.2** W/cm2 of Interlocked cage **5** in methanol.

Near-infrared photothermal conversion efficiency η of **5** of **1.2** W/cm2 was calculated by equations above. A fitting linear of lnθ-t was obtained by Eqs (3) and (4), by which τs was calculated as 96.99 s. Thus, hS = 1.3898/96.99 = 1.43 × 10-2 J·K-1·S-1. ΔTsample = 10.8 ℃ (35.8 - 25). A5 = 0.336 (Fig. 4d in main text). η5 = 1.43 × 10-2 × (10.8 – 2.2)/[1.2 × (1 – 10-0.336)] = 19.0%.


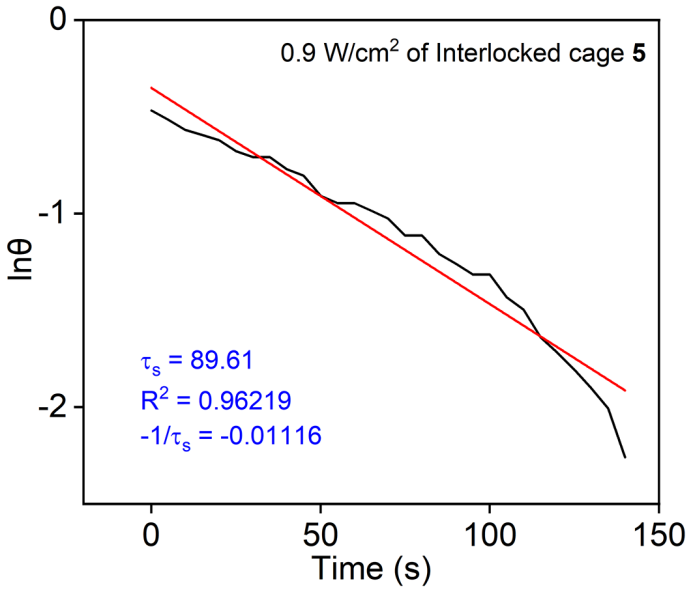


**Supplementary Figure 29.** Fitting linear of lnθ-t of **0.9** W/cm2 of Interlocked cage **5** in methanol.

Near-infrared photothermal conversion efficiency η of **5** of **0.9** W/cm2 was calculated by equations above. A fitting linear of lnθ-t was obtained by Eqs (3) and (4), by which τs was calculated as 89.61 s. Thus, hS = 1.3898/89.61 = 1.55 × 10-2 J·K-1·S-1. ΔTsample = 6.7 ℃ (31.7 - 25). A5 = 0.336 (Fig. 4d in main text). η5 = 1.55 × 10-2 × (6.7 – 2.2)/[0.9 × (1 – 10-0.336)] = 14.3 %.


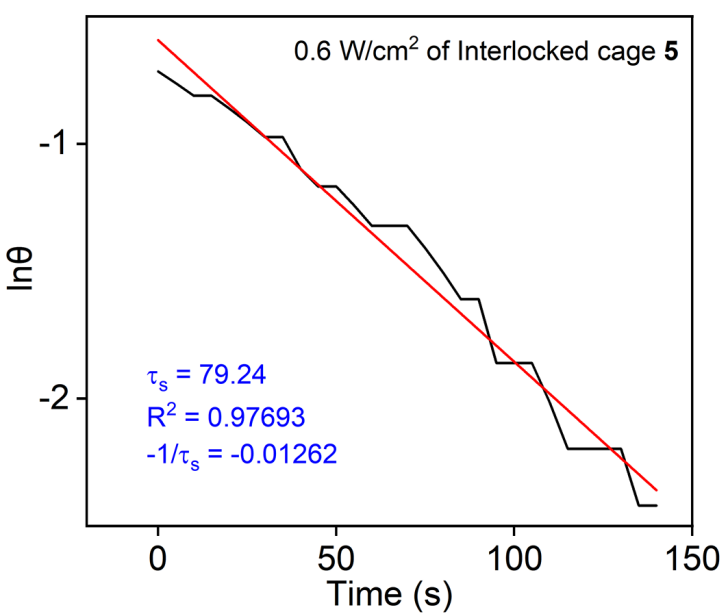


**Supplementary Figure 30.** Fitting linear of lnθ-t of **0.6** W/cm2 of Interlocked cage **5** in methanol.

Near-infrared photothermal conversion efficiency η of **5** of **0.6** W/cm2 was calculated by equations above. A fitting linear of lnθ-t was obtained by Eqs (3) and (4), by which τs was calculated as 79.24 s. Thus, hS = 1.3898/79.24 = 1.75 × 10-2 J·K-1·S-1. ΔTsample = 4.5 ℃ (29.5 - 25). A5 = 0.336 (Fig. 4d in main text). η5 = 1.75 × 10-2 × (4.5– 2.2)/[0.6 × (1 – 10-0.336)] = 12.4 %.


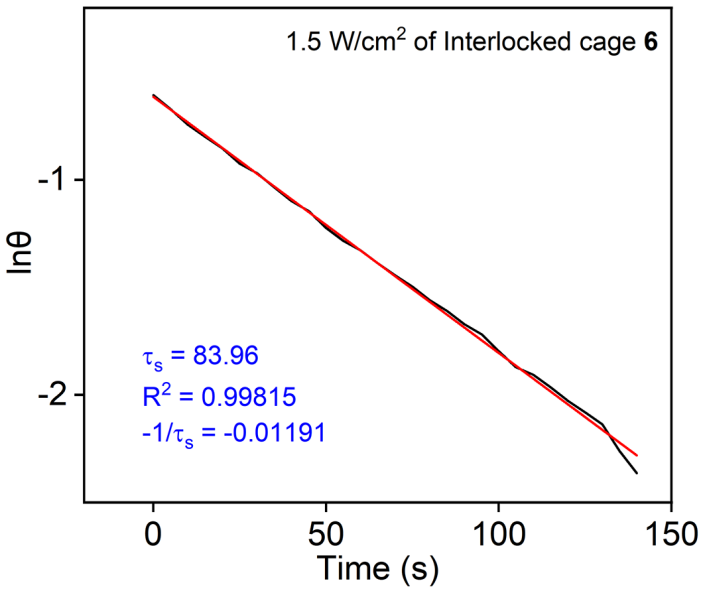


**Supplementary Figure 31.** Fitting linear of lnθ-t of **1.5** W/cm2 of Interlocked cage **6** in methanol.

Near-infrared photothermal conversion efficiency η of **6** of **1.5** W/cm2 was calculated by equations above. A fitting linear of lnθ-t was obtained by Eqs (3) and (4), by which τs was calculated as 89.36 s. Thus, hS = 1.3898/89.36 = 1.55 × 10-2 J·K-1·S-1. ΔTsample = 55℃ (80 - 25). A6 = 0.843(Fig. 4d in main text). η6 = 1.22 × 10-2 × (55 – 2.2)/[1.5 × (1 – 10-0.843)] = 63.9 %.


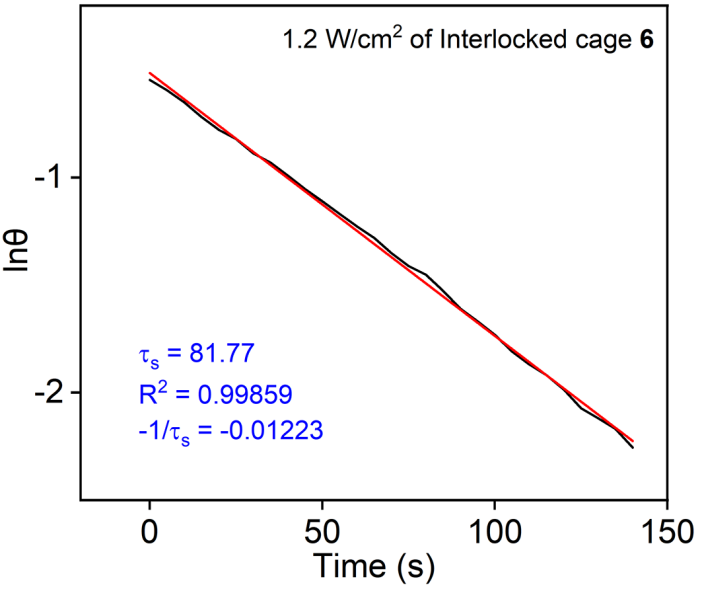


**Supplementary Figure 32.** Fitting linear of lnθ-t of **1.2** W/cm2 of Interlocked cage **6** in methanol.

Near-infrared photothermal conversion efficiency η of **6** of **1.2** W/cm2 was calculated by equations above. A fitting linear of lnθ-t was obtained by Eqs (3) and (4), by which τs was calculated as 81.77 s. Thus, hS = 1.3898/81.77 = 1.69 × 10-2 J·K-1·S-1. ΔTsample = 49 ℃ (74- 25). A6 = 0.843 (Fig. 4d in main text). η6 = 1.69 × 10-2 × (49 – 2.2)/[1.2 × (1 – 10-0.843)] = 77.3 %.


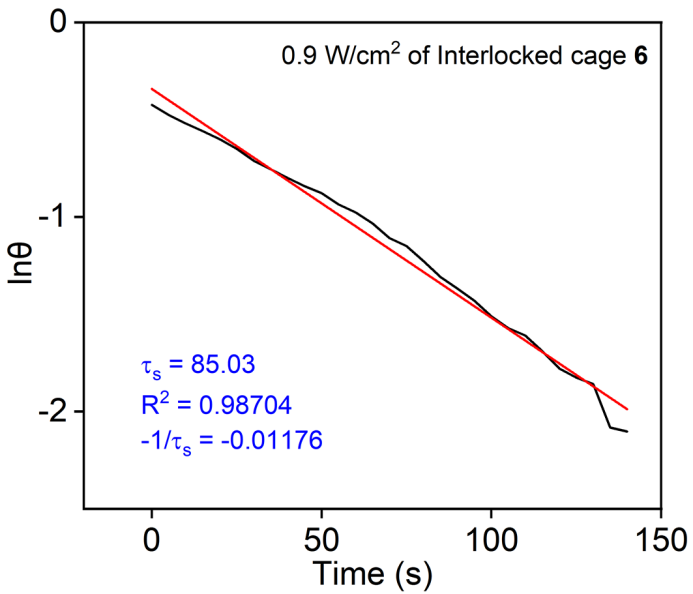


**Supplementary Figure 33.** Fitting linear of lnθ-t of **0.9** W/cm2 of Interlocked cage **6** in methanol.

Near-infrared photothermal conversion efficiency η of **6** of **0.9** W/cm2 was calculated by equations above. A fitting linear of lnθ-t was obtained by Eqs (3) and (4), by which τs was calculated as 85.03 s. Thus, hS = 1.3898/85.03 = 1.82 × 10-2 J·K-1·S-1. ΔTsample = 35 ℃ (60 - 25). A6 = 0.843 (Fig. 4d in main text). η6 = 1.82 × 10-2 × (35 – 2.2)/[0.9 × (1 – 10-0.843)] = 69.5 %.

**
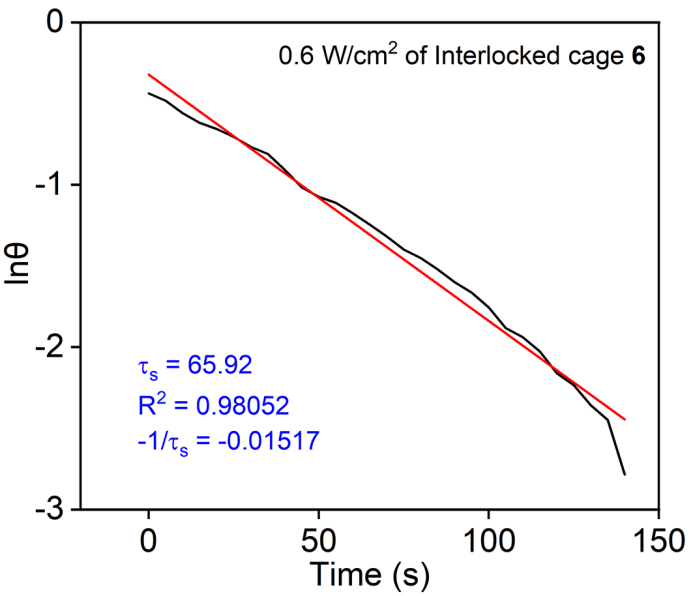
**

**Supplementary Figure 34.** Fitting linear of lnθ-t of **0.6** W/cm2 of Interlocked cage **6** in methanol.

Near-infrared photothermal conversion efficiency η of **6** of **0.6** W/cm2 was calculated by equations above. A fitting linear of lnθ-t was obtained by Eqs (3) and (4), by which τs was calculated as 65.92 s. Thus, hS = 1.3898/65.92 = 2.11 × 10-2 J·K-1·S-1. ΔTsample = 20.8 ℃ (45.8 - 25). A6 = 0.843 (Fig. 4d in main text). η6 = 2.11 × 10-2 × (20.8 – 2.2)/[0.6 × (1 – 10-0.843)] = 76.3%.

**
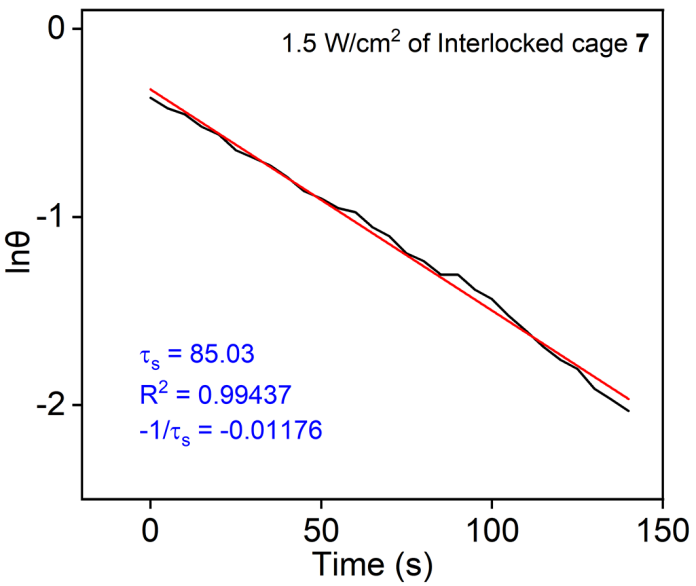
**

**Supplementary Figure 35.** Fitting linear of lnθ-t of **1.5** W/cm2 of Interlocked cage **7** in methanol.

Near-infrared photothermal conversion efficiency η of **7** of **1.5** W/cm2 was calculated by equations above. A fitting linear of lnθ-t was obtained by Eqs (3) and (4), by which τs was calculated as 85.03 s. Thus, hS = 1.3898/85.03 = 1.63 × 10-2 J·K-1·S-1. ΔTsample = 24.4 ℃ (49.4 - 25). A7 = 0.501 (Fig. 4d in main text). η7 = 1.63 × 10-2 × (24.4 – 2.2)/[1.5 × (1 – 10-0.503)] = 35.3 %.

**
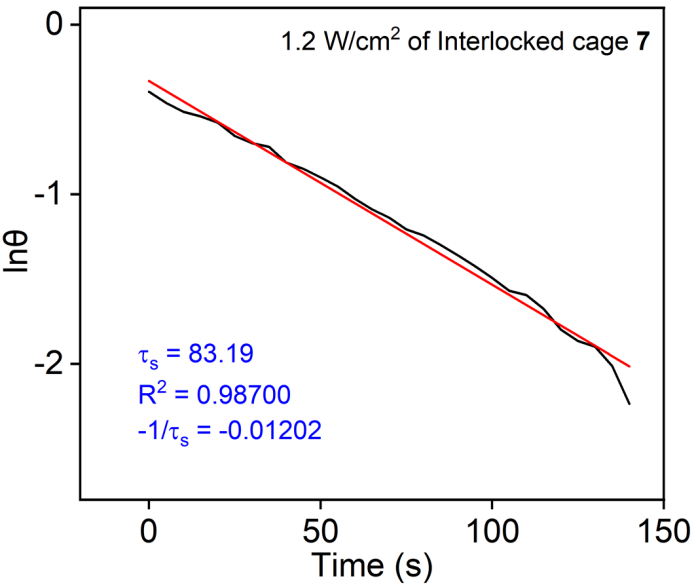
**

**Supplementary Figure 36.** Fitting linear of lnθ-t of **1.2** W/cm2 of Interlocked cage **7** in methanol.

Near-infrared photothermal conversion efficiency η of **7** of **1.2** W/cm2 was calculated by equations above. A fitting linear of lnθ-t was obtained by Eqs (3) and (4), by which τs was calculated as 83.19 s. Thus, hS = 1.3898/83.19 = 1.67 × 10-2 J·K-1·S-1. ΔTsample = 18.6℃ (43.6 - 25). A7 = 0.501 (Fig. 4d in main text). η7 = 1.67 × 10-2 × (18.6 – 2.2)/[1.2 × (1 – 10-0.503)] = 33.3%.

**
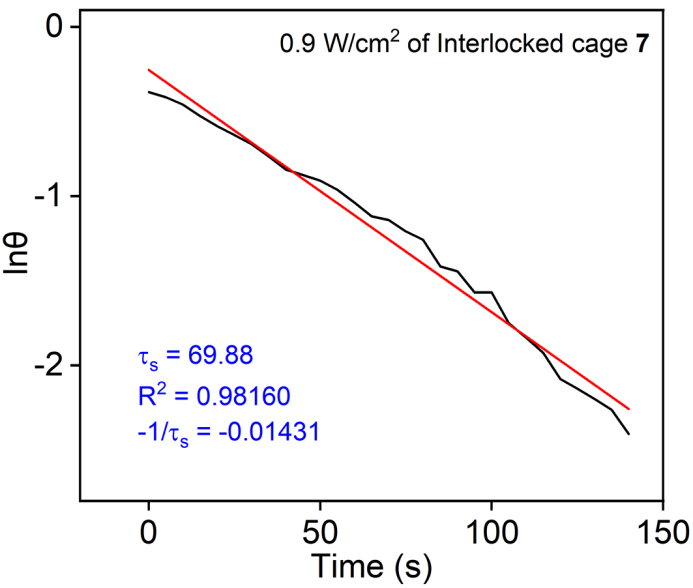
**

**Supplementary Figure 37.** Fitting linear of lnθ-t of **0.9** W/cm2 of Interlocked cage **7** in methanol.

Near-infrared photothermal conversion efficiency η of **7** of **0.9** W/cm2 was calculated by equations above. A fitting linear of lnθ-t was obtained by Eqs (3) and (4), by which τs was calculated as 69.88 s. Thus, hS = 1.3898/69.88 = 1.98 × 10-2 J·K-1·S-1. ΔTsample = 14.4 ℃ (39.4 - 25). A7 = 0.501 (Fig. 4d in main text). η7 = 1.98 × 10-2 × (14.4 – 2.2)/[0.9 × (1 – 10-0.503)] = 39.3 %.

**
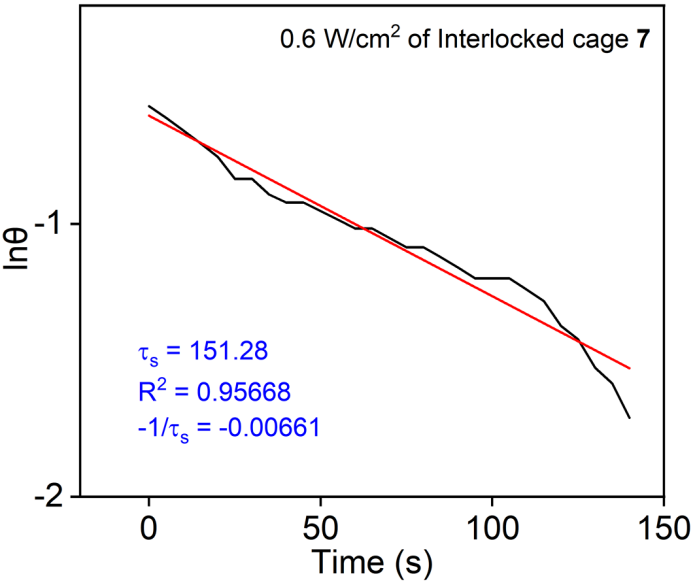
**

**Supplementary Figure 38.** Fitting linear of lnθ-t of **0.6** W/cm2 of Interlocked cage **7** in methanol.

Near-infrared photothermal conversion efficiency η of **7** of **0.6** W/cm2 was calculated by equations above. A fitting linear of lnθ-t was obtained by Eqs (3) and (4), by which τs was calculated as 151.28 s. Thus, hS = 1.3898/151.28 = 0.91 × 10-2 J·K-1·S-1. ΔTsample = 8.3 ℃ (33.3 - 25). A7 = 0.501 (Fig. 4d in main text). η7 = 0.91 × 10-2 × (4.7 – 2.2)/[0.6 × (1 – 10-0.503)] = 13.6 %.

1. **Water contact test**

**
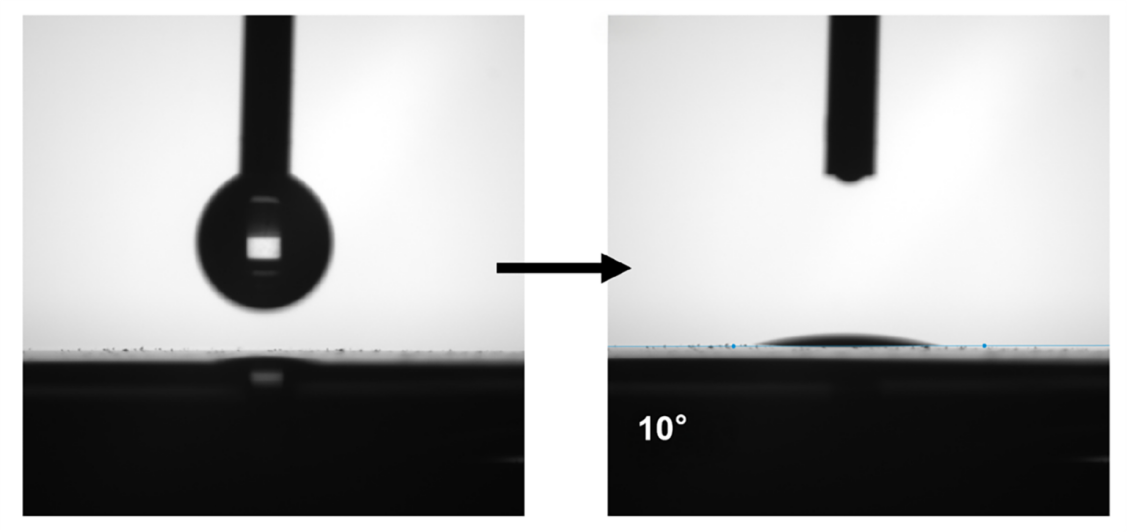
**

**Supplementary Figure 39**. Water contact of cellulose membrane.

1. **X-ray crystallography details**

Single crystals of compounds **2**, **3**, **5** and **6**, suitable for X-ray diffraction study were obtained at room temperature. X-ray intensity data of them were collected at 150 K on a CCD-Bruker SMART APEX system. In these data, the disordered solvent molecules which could not be restrained properly were removed using the PLATON Squeeze routine.

In asymmetric unit of compound **2**,A solvent mask was calculated and 1323 electrons were found in a volume of 4535\%A^3^ in 1 void per unit cell. This is consistent with the presence of 9[CF3SO3] per formula unit which account for 1314 electrons per unit cell.

In asymmetric unit of compound **3**,A solvent mask was calculated and 1288 electrons were found in a volume of 5624\%A^3^ in 1 void per unit cell. This is consistent with the presence of 4.5[CF3SO3] per formula unit which account for 1314 electrons per unit cell.

In asymmetric unit of compound **5**, A solvent mask was calculated and 3320 electrons were found in a volume of 10938\%A^3^ in 3 voids per unit cell. This is consistent with the presence of 11.5[CF3SO3], 0.25[CF3SO3] per formula unit which account for 3431 electrons per unit cell.

| **Table 1 Crystal data and structure refinement for 2.** | |
| --- | --- |
| Identification code | *P*-1 |
| Empirical formula | C216H196O40N12F24S8Rh8 |
| Formula weight | 5135.67 |
| Temperature/K | 150.00 |
| Crystal system | triclinic |
| Space group | *P*-1 |
| a/Å | 15.1059(5) |
| b/Å | 22.4303(9) |
| c/Å | 37.6847(13) |
| α/° | 75.117(2) |
| β/° | 87.804(2) |
| γ/° | 71.666(2) |
| Volume/Å3 | 11701.4(7) |
| Z | 4 |
| ρcalcg/cm3 | 1.500 |
| μ/mm‑1 | 6.005 |
| F(000) | 5346.0 |
| Crystal size/mm3 | 0.15 × 0.15 × 0.15 |
| Radiation | GaKα (λ = 1.54178) |
| Index ranges | -14≤ h ≤ 15, -22 ≤ k ≤ 22, -37 ≤ l ≤ 27 |
| 2Θ range for data collection/° | 2.177 to 50.483 |
| Reflections collected | 126441 |
| Independent reflections | 24438 [Rint  = 0.0853, Rsigma  = 0.107] |
| Data/restraints/parameters | 24438/3273/2042 |
| Goodness-of-fit on F2 | 1.031 |
| Final R indexes [I>=2σ (I)] | R1  = 0.0922, wR2  = 0.1913 |
| Final R indexes [all data] | R1  = 0.1230, wR2  = 0.2036 |
| Largest diff. peak/hole / e Å-3 | 1.571/-1.671 |
| CCDC number | 2400896 |

| **Table 2 Crystal data and structure refinement for 3.** | |
| --- | --- |
| Identification code | *P*21/n |
| Empirical formula | C200H180O24N12Br8F24S8 |
| Formula weight | 5130.62 |
| Temperature/K | 150.00 |
| Crystal system | monoclinic |
| Space group | *P*21/n |
| a/Å | 19.9240(8) |
| b/Å | 27.1078(10) |
| c/Å | 25.9815(9) |
| α/° | 90 |
| β/° | 104.644(2) |
| γ/° | 90 |
| Volume/Å3 | 13576.7(9) |
| Z | 4 |
| ρcalcg/cm3 | 1.508 |
| μ/mm‑1 | 6.875 |
| F(000) | 6120.0 |
| Crystal size/mm3 | 0.15 × 0.15 × 0.15 |
| Radiation | GaKα (λ = 1.54178) |
| Index ranges | -23 ≤ h ≤ 22, -28 ≤ k ≤ 32, -29 ≤ l ≤ 31 |
| 2Θ range for data collection/° | 2.813 to 67.559 |
| Reflections collected | 102917 |
| Independent reflections | 24007 [Rint  = 0.1354, Rsigma  = 0.147] |
| Data/restraints/parameters | 24007/1684/1071 |
| Goodness-of-fit on F2 | 1.0085 |
| Final R indexes [I>=2σ (I)] | R1  = 0.1387, wR2  = 0.2606 |
| Final R indexes [all data] | R1  = 0.2351, wR2  = 0.3148 |
| Largest diff. peak/hole / e Å-3 | 1.795/-0.955 |
| CCDC number | 2400898 |

| **Table 3 Crystal data and structure refinement for 5.** | |
| --- | --- |
| Identification code | *P*21/n |
| Empirical formula | C300H280O60N16F36S12Rh12 |
| Formula weight | 7373.12 |
| Temperature/K | 150.00 |
| Crystal system | monoclinic |
| Space group | *P*21/n |
| a/Å | 30.2830(10) |
| b/Å | 32.1268(12) |
| c/Å | 36.5647(14) |
| α/° | 90 |
| β/° | 94.511(2) |
| γ/° | 90 |
| Volume/Å3 | 35463(2) |
| Z | 4 |
| ρcalcg/cm3 | 1.568 |
| μ/mm‑1 | 6.342 |
| F(000) | 16882 |
| Crystal size/mm3 | 0.15 × 0.15 × 0.15 |
| Radiation | GaKα (λ = 1.54178) |
| Index ranges | -30 ≤ h ≤ 33, -34 ≤ k ≤ 35, -40≤ l ≤ 40 |
| 2Θ range for data collection/° | 1.825 to 59.256 |
| Reflections collected | 21206 |
| Independent reflections | 51070 [Rint  = 0.1864, Rsigma  = 0.103] |
| Data/restraints/parameters | 51070/6161/3409 |
| Goodness-of-fit on F2 | 1.094 |
| Final R indexes [I>=2σ (I)] | R1  = 0.1055, wR2  = 0.2223 |
| Final R indexes [all data] | R1  = 0.1899, wR2  = 0.2598 |
| Largest diff. peak/hole / e Å-3 | 1.501/-1.206 |
| CCDC number | 2400897 |

| **Table 4 Crystal data and structure refinement for 6.** | |
| --- | --- |
| Identification code | *P*21/c |
| Empirical formula | C312H292O60N16F36S12Rh12 |
| Formula weight | 7529.35 |
| Temperature/K | 150.00 |
| Crystal system | monoclinic |
| Space group | *P*21/c |
| a/Å | 29.175(3) |
| b/Å | 26.200(2) |
| c/Å | 28.400(2) |
| α/° | 90 |
| β/° | 113.682(4) |
| γ/° | 90 |
| Volume/Å3 | 19881(3) |
| Z | 4 |
| ρcalcg/cm3 | 0.983 |
| μ/mm‑1 | 64.285 |
| F(000) | 6016 |
| Crystal size/mm3 | 0.154 × 0.1 × 0.1 |
| Radiation | GaKα (λ = 1.54178) |
| Index ranges | -29 ≤ h ≤ 25, -26 ≤ k ≤ 26, -26 ≤ l ≤ 28 |
| 2Θ range for data collection/° | 2.362 to 51.089 |
| Reflections collected | 83179 |
| Independent reflections | 21140 [Rint  = 0.1180, Rsigma  = 0.082] |
| Data/restraints/parameters | 21140/2536/1351 |
| Goodness-of-fit on F2 | 1.109 |
| Final R indexes [I>=2σ (I)] | R1  = 0.1778, wR2  = 0.3968 |
| Final R indexes [all data] | R1  = 0.2771, wR2  = 0.4505 |
| Largest diff. peak/hole / e Å-3 | 0.800/-0.492 |
| CCDC number | 2400895 |

1. **References**
2. C. White, A. Yates and P. M. Maitlis, *η*5 -Pentamethylcyclopentadienyl) rhodium and -iridium compounds. *Inorg. Synth*., **1992**, *29*, 228-234.
3. T. Wu, L. H. Weng and G. X. Jin, Sunlight induced cycloaddition and host–guest property of self-assembled organometallic macrocycles based on a versatile building block. *Chem. Comm*., **2012**, *48*, 4435-4437
